# Supplementary material for: Imputation Disparities Driven by Recent Selection and Their Impact on Disease Risk Estimation in East and Southeast Asian Populations
Source: bioRxiv preprint, doi:10.1101/2025.04.03.646928, version 1 (2025-04-07)
Supplement: Supplemental Tables 9-13 [file 646928_file05.xlsx]

## Sheet: Supplementary Table 9
Supplementary Table 9 Regions showing significant variation across reference panels in the Chinese dataset
Window_chr	Window_start	Window_end	IQS Variance	Genes within the region	Combined_window_length*	Panel with the best performance
chr1	118800001	118900000	0.0211028	TBX15	100000	ChinaMAP
chr2	89300001	89400000	0.0253881	IGKV1-39;IGKV2-38;IGKV2-40	100000	1KG
chr2	89600001	89700000	0.0261659	AC006453.1;AC006453.2;AC006453.4;AC006453.6	100000	ChinaMAP
chr3	163600001	163700000	0.0266148	.	100000	ChinaMAP
chr3	197400001	197500000	0.0240295	AC128709.1;AC128709.2;AC128709.3	100000	ChinaMAP
chr4	68800001	68900000	0.0224263	AC021146.11;AC021146.2;AC021146.4;AC021146.8;AC021146.9;UGT2B10	100000	ChinaMAP
chr5	131300001	131400000	0.0202017	CDC42SE2	100000	ChinaMAP
chr6	61100001	61600000	0.0204857	AL356131.1;MTRNR2L9	500000	ChinaMAP
chr7	63500001	63600000	0.0229524	PHKG1P2;SEPTIN7P5;SLC29A4P2;TNRC18P2	100000	TOPMed
chr8	47000001	47300000	0.0221232	AC120036.1;AC120036.2;AC120036.3;AC120036.4;AC120036.5;ATP6V1G1P2;IGLV8OR8-1;NDUFA5P12;RN7SKP32;RNU6-819P;RPL10AP2;SPIDR	300000	ChinaMAP
chr8	47600001	48100000	0.0210056	AC021236.1;AC103686.1;CEBPD;MCM4;PRKDC;RNU6-519P;RNU6-665P;SPIDR;UBE2V2	500000	ChinaMAP
chr9	64800001	64900000	0.0272854	AC125634.1;AL359955.1;BNIP3P4;RNU6-1293P	100000	WBBC
chr10	42100001	42200000	0.0203476	IGKV1OR10-1;KSR1P1	100000	TOPMed
chr10	73000001	73100000	0.0221247	AL731563.1;AL731563.2;AL731563.3;AL731563.4;P4HA1;RPL17P50	100000	ChinaMAP
chr10	73400001	73500000	0.0428485	ANXA7;MSS51;PPP3CB;PPP3CB-AS1;RPL26P6;USP54	100000	ChinaMAP
chr11	55400001	55600000	0.0254541	OR4A10P;OR4A13P;OR4A17P;OR4A21P;OR4A50P;OR4C14P;OR4C15;OR4C16;OR4C1P;OR4X7P	200000	ChinaMAP
chr11	55900001	56200000	0.0406712	OR10AF1P;OR10AG1;OR10AK1P;OR5AQ1P;OR5AS1;OR5BE1P;OR5BN1P;OR5BN2P;OR5F1;OR5F2P;OR5I1;OR5J1P;OR5J2;OR5J7P;OR5W1P;OR5W2;OR7E5P;OR8H2;OR8H3;OR8I2;OR8I4P;OR8J3;OR8K4P;OR8K5;OR8V1P	300000	ChinaMAP
chr11	56700001	56800000	0.0304989	AP001803.1;AP001803.3;MIR6128;OR5G1P;OR5G4P;OR9G1;OR9G2P;OR9G3P;OR9G4	100000	ChinaMAP
chr11	89800001	89900000	0.05214	AP004833.1;AP005435.1;AP005435.2;AP005435.3;AP005435.4;TRIM49;TRIM51BP;TRIM53BP;TRIM64B	100000	ChinaMAP
chr13	82000001	82100000	0.0200352	.	100000	ChinaMAP
chr15	82400001	82500000	0.0349605	AC243919.2;AC245033.3;CSPG4P10;GOLGA2P10;GOLGA6L9;UBE2Q2P2;UBE2Q2P6	100000	ChinaMAP
chr16	32100001	32200000	0.0233121	ABHD17AP8;AC133485.4;AC133485.5;AC133485.6;AC133485.7;AC142381.2;HERC2P4	100000	CHN100k
chr17	40900001	41000000	0.0283957	AC004231.1;KRT23;KRT39;KRT40;KRTAP3-2;KRTAP3-3	100000	ChinaMAP
chr20	30100001	30200000	0.0219645	.	100000	ChinaMAP
*Consecutive windows were merged in the table

## Sheet: Supplementary Table 10
Supplementary Table 10 Regions showing significant variation across reference panels in the Thai dataset
Window_chr	Window_start	Window_end	IQS Variance	Genes within the region	Combined_window_length*	Panel with the best performance
chr1	13300001	13400000	0.023732	AC243961.1;PRAMEF14;PRAMEF15;PRAMEF17;PRAMEF19;PRAMEF33	100000	CHN100k
chr1	36000001	36100000	0.0275046	ADPRS;AGO3;AL138787.1;AL138787.2;COL8A2;TEKT2	100000	ChinaMAP
chr1	40100001	40200000	0.0303811	OAZ1P1;RLF;RNU6-1237P	100000	ChinaMAP
chr1	46300001	46400000	0.0315936	AL122001.1;FAAH;LRRC41;NSUN4;UQCRH	100000	ChinaMAP
chr1	88700001	88900000	0.0403462	ELOCP19;GTF2B;PKN2;RNU6-125P	200000	1KG
chr1	100000001	100100000	0.0257531	AC093019.1;AC093019.2;AC118553.2;MFSD14A;RNU6-1318P;SASS6;SLC35A3	100000	1KG
chr1	103600001	103700000	0.0304656	AC105272.1;AMY1A;AMY1B;AMY2A	100000	TOPMed
chr1	108400001	108500000	0.0393826	AL390038.1;AL392088.2;NBPF5P;NBPF6;SLC25A24P2	100000	CHN100k
chr1	161500001	161600000	0.0253434	AL590385.1;AL590385.2;FCGR2A;FCGR2C;FCGR3A;HSPA6;RPS23P10	100000	1KG
chr1	171000001	171100000	0.0314484	BX284613.1;BX284613.2;FMO3;MROH9	100000	CHN100k
chr1	247700001	247800000	0.0385906	AC118470.1;AL390860.1;OR14A2;OR14K1;OR1C1;OR6F1;OR9H1P	100000	SEAD
chr2	82200001	82300000	0.0299599	LYARP1;RNU6-685P	100000	CHN100k
chr2	94600001	94700000	0.0210956	AL845331.2	100000	1KG
chr2	95100001	95200000	0.0219387	MRPS5;SLC2AXP1;ZNF2;ZNF514	100000	1KG
chr2	138500001	138600000	0.0299665	AC092620.1;AC092620.2;AC114763.1;SPOPL	100000	SEAD
chr3	48000001	48100000	0.0216036	AC124916.2;MAP4;RN7SL664P	100000	ChinaMAP
chr3	51500001	51700000	0.0247662	AC099050.1;DCAF1;RAD54L2;RNA5SP132;RNU6ATAC29P;TEX264	200000	ChinaMAP
chr3	90300001	90500000	0.0231058	.	200000	1KG
chr3	94600001	94700000	0.0269551	.	100000	ChinaMAP
chr3	94900001	95000000	0.0259356	AC140059.1;LINC00879;WDR82P1	100000	ChinaMAP
chr3	151600001	151700000	0.0268655	LINC02066	100000	CHN100k
chr3	156000001	156200000	0.0252247	AC091607.1;AC091607.2;ALG1L15P;KCNAB1;MRE11P1;VN2R1P	200000	CHN100k
chr3	163600001	163700000	0.0332728	.	100000	TOPMed
chr3	168300001	168400000	0.0214492	EGFEM1P	100000	ChinaMAP
chr3	197400001	197500000	0.0362728	AC128709.1;AC128709.2;AC128709.3	100000	ChinaMAP
chr4	49300001	49400000	0.0355285	.	100000	TOPMed
chr4	63700001	63800000	0.0245858	.	100000	ChinaMAP
chr4	86500001	86600000	0.0335644	MAPK10;MIR4452;PTPN13	100000	ChinaMAP
chr4	86700001	86900000	0.0381773	AC093827.1;AC093827.2;AC093827.5;C4orf36;PTPN13;SLC10A6	200000	ChinaMAP
chr4	122200001	122300000	0.0327166	KIAA1109	100000	CHN100k
chr4	184700001	184800000	0.0244515	AC084871.1;ACSL1;CENPU	100000	ChinaMAP
chr5	45900001	46200000	0.0200392	.	300000	1KG
chr5	46300001	46400000	0.0229456	.	100000	1KG
chr5	125600001	125700000	0.0240198	AC116362.1;AC116362.2;LINC02240	100000	CHN100k
chr5	130200001	130300000	0.0200935	.	100000	CHN100k
chr5	131300001	131500000	0.0325485	AC008497.1;AC008695.1;CDC42SE2;RAPGEF6	200000	1KG
chr5	131800001	131900000	0.0232758	AC034228.3;MEIKIN	100000	1KG
chr5	144400001	144500000	0.0230131	AC109441.1;CKS1BP5;KCTD16	100000	ChinaMAP
chr6	57700001	57900000	0.0247403	AL021368.3;AL021368.5	200000	ChinaMAP
chr6	61200001	61300000	0.0215065	AL356131.1	100000	1KG
chr6	61400001	61600000	0.0289265	MTRNR2L9	200000	1KG
chr6	62400001	62500000	0.023254	DHFRP5	100000	1KG
chr6	78800001	79100000	0.0410422	AL356776.1;AL356776.2;AL450327.1;IRAK1BP1;PHIP	300000	ChinaMAP
chr6	145700001	145800000	0.0253689	AL023806.1;AL023806.2;AL023806.3;AL023806.4;AL023806.5;AL356599.1;EPM2A;FBXO30	100000	TOPMed
chr7	61000001	61100000	0.0209737	.	100000	1KG
chr7	61200001	61300000	0.0292692	.	100000	1KG
chr7	62100001	62200000	0.0632572	.	100000	1KG
chr7	62300001	62400000	0.021712	.	100000	1KG
chr7	62500001	62900000	0.022831	.	400000	1KG
chr7	65500001	65600000	0.0235847	AC114501.1;AC114501.2	100000	TOPMed
chr7	115900001	116000000	0.0290285	TFEC	100000	1KG
chr7	133800001	133900000	0.0266515	EXOC4	100000	1KG
chr7	143100001	143200000	0.0224186	PIP;TAS2R39	100000	CHN100k
chr7	146300001	146400000	0.020323	AC007027.1;CNTNAP2	100000	ChinaMAP
chr8	33700001	33800000	0.0250096	AF279873.3;RN7SL457P;VENTXP5	100000	1KG
chr8	38200001	38300000	0.0241917	AC084024.2;AC084024.4;AC087362.2;BAG4;DDHD2;NSD3;PLPP5	100000	ChinaMAP
chr8	47700001	47900000	0.0208148	AC103686.1;CEBPD;PRKDC;SPIDR	200000	1KG
chr8	56000001	56100000	0.0594322	AC046176.1;CERNA3;LYN;RN7SL323P;RPS20;SNORD54	100000	CHN100k
chr8	65800001	65900000	0.0454174	AC100812.1;PDE7A	100000	1KG
chr8	85000001	85100000	0.0249686	AC091175.1	100000	1KG
chr8	98900001	99200000	0.0217712	AC016877.1;AC016877.2;AC016877.3;AC104986.1;AC107909.1;AC107909.2;MRPL57P7;OSR2;RN7SKP85;STK3;VPS13B;VPS13B-DT	300000	1KG
chr8	103500001	103700000	0.023101	AC007751.1;AC012213.1;AC012213.5;PTMAP15;RIMS2	200000	1KG
chr8	116000001	116100000	0.0248277	LINC00536;RNA5SP276	100000	1KG
chr9	15500001	15600000	0.0253283	AL513423.1;CCDC171;FTH1P12;HMGN2P16;PSIP1;RN7SL98P;RNU6-246P	100000	1KG
chr9	89100001	89200000	0.0270499	AL353150.1;SHC3	100000	CHN100k
chr9	100100001	100300000	0.0437936	AL137072.1;INVS;NANOGP5;RN7SL75P;RPS2P35	200000	1KG
chr10	10300001	10400000	0.0219502	AL354916.2;AL583859.1;AL583859.2;CELF2-DT	100000	SEAD
chr10	11900001	12000000	0.0245411	RNU6-1095P;UPF2	100000	CHN100k
chr10	22200001	22300000	0.0308173	AL157831.2;AL157831.3;AL158211.1;AL158211.5;EBLN1;PSME2P6;RPL31P45	100000	ChinaMAP
chr10	26000001	26100000	0.0239938	MYO3A	100000	1KG
chr10	37800001	38000000	0.0232668	AL117337.1;AL135791.1;TLK2P2;ZNF248;ZNF25;ZNF25-DT;ZNF33CP;ZNF37CP	200000	1KG
chr10	38100001	38200000	0.027721	AL117339.1;AL117339.3;AL117339.4;CCNYL4;ZNF37A	100000	1KG
chr10	38400001	38800000	0.0246153	ABCD1P2;ACTR3BP5;AL133173.1;AL133173.2;AL133216.1;AL133216.2;AL590623.1;CHEK2P5;CICP9;PABPC1P12;RNU6-1118P;SEPTIN7P9;SLC9B1P3	400000	1KG
chr10	45700001	45800000	0.0222671	AGAP10P;AL645998.1;FAM21FP;WASHC2C	100000	1KG
chr10	47900001	48000000	0.0325222	AC245041.1;AC245041.2;FAM25C;NPY4R2	100000	1KG
chr11	3700001	3800000	0.0210905	NUP98;PGAP2;RNU6-1143P;RNU7-50P	100000	ChinaMAP
chr11	49800001	50200000	0.0222814	AC109635.4;AC109635.7;AC130364.1;AC130364.2;AC136759.1;AP006587.1;AP006587.2;AP006587.3;AP006587.4;AP006587.5;AP006587.6;GTF2IP11;OR4A18P;OR4A19P;OR4A1P;OR4A49P;OR4C12;OR4C13;OR4C45;OR4C48P;OR4C49P;OR4R3P;TRIM51DP;TRIM51FP	400000	1KG
chr11	55000001	55200000	0.0280007	.	200000	1KG
chr11	63300001	63400000	0.0250177	SLC22A10;SLC22A9	100000	ChinaMAP
chr11	73800001	73900000	0.0215112	CCDC58P5;COA4;MRPL48;PAAF1;RN7SKP243	100000	TOPMed
chr11	105300001	105500000	0.0201488	AP003530.1;CARD18	200000	ChinaMAP
chr12	18700001	18900000	0.024377	AC087242.1;CAPZA3;PLCZ1	200000	ChinaMAP
chr12	34000001	34400000	0.0224776	AC046130.2;AC046130.3;AC140847.1;AC140847.2;AC140847.3;AK6P1;ALG10;DUX4L27;RNA5SP357;TUBB8P4	400000	1KG
chr12	37400001	37500000	0.0212667	.	100000	1KG
chr12	49300001	49500000	0.0241744	AC125611.1;AC125611.2;AC125611.4;C1QL4;DNAJC22;SPATS2;TROAP	200000	SEAD
chr13	20600001	20700000	0.0221818	AL161772.1;IFT88;RNU2-7P;SLC35E1P1	100000	1KG
chr13	47400001	47500000	0.0246621	RN7SL700P	100000	SEAD
chr13	82000001	82100000	0.0345619	.	100000	ChinaMAP
chr13	112300001	112400000	0.042718	LINC01043;LINC01044;SPACA7	100000	1KG
chr14	66800001	66900000	0.0234281	GPHN	100000	1KG
chr15	31700001	31800000	0.0325916	AC026951.1;AC026951.2;OTUD7A	100000	SEAD
chr15	42300001	42400000	0.0222721	AC012651.1;BNIP3P5;CAPN3;GANC	100000	1KG
chr15	43300001	43400000	0.0284709	AC009852.1;ADAL;LCMT2;RN7SL487P;TGM7;TUBGCP4;ZSCAN29	100000	1KG
chr15	50400001	50500000	0.0236797	AC012170.1;AHCYP7;RNA5SP395;USP50;USP8	100000	ChinaMAP
chr15	64400001	64800000	0.0238604	AC090543.1;AC090543.2;AC090543.3;AC091231.1;AC091231.2;AC100830.1;AC100830.2;AC100830.3;GAPDHP61;MIR1272;OAZ2;RBPMS2;RNU6-549P;TRIP4;ZNF609	400000	1KG
chr16	30200001	30300000	0.0382872	AC106782.1;AC106782.2;AC106782.3;AC106782.6;NPIPB13;SLX1A-SULT1A3;SMG1P5;SULT1A3	100000	TOPMed
chr16	47100001	47900000	0.0334054	AC007494.1;AC007494.2;AC007494.3;AC007533.1;AC007533.2;AC007599.1;AC007599.2;AC007599.3;AC141846.1;EIF4BP5;ITFG1;ITFG1-AS1;LINC02133;LINC02192;NDUFA5P11;NETO2;PHKB;RNA5SP425;RPL23AP72	800000	1KG
chr16	65400001	65500000	0.0346966	AC009055.1;LINC00922	100000	CHN100k
chr16	70100001	70200000	0.0273657	AC009060.1;CLEC18C;PDPR	100000	1KG
chr17	22000001	22100000	0.0234045	ABBA01006766.1;NCOR1P2;UBBP4	100000	TOPMed
chr17	22700001	22800000	0.0209985	AC131274.3	100000	1KG
chr17	30900001	31000000	0.0265147	AC138207.1;AC138207.4;AC138207.5;AC138207.7;AC138207.9;ADAP2;DPRXP4;RN7SL138P;RNF135;TEFM	100000	ChinaMAP
chr17	31900001	32000000	0.0365891	RNA5SP437;SUZ12;UTP6	100000	1KG
chr17	45400001	45500000	0.0207003	AC091132.2;ARHGAP27;MIR4315-1;PLEKHM1	100000	ChinaMAP
chr17	58700001	58800000	0.0205862	AC025521.1;AC025521.2;PPM1E;RAD51C	100000	1KG
chr17	62900001	63100000	0.0297923	AC005972.1;AC005972.2;AC005972.3;AC006270.3;MIR633;TANC2;TRMT112P3	200000	ChinaMAP
chr18	34500001	34600000	0.0298859	AC013290.1;DTNA	100000	TOPMed
chr19	24100001	24400000	0.0340462	AC073534.1;AC073534.2;ZNF254	300000	1KG
chr19	34200001	34300000	0.031986	KIAA0355;LSM14A;RPL29P33	100000	ChinaMAP
chr19	42800001	43000000	0.0348036	AC004784.1;CEACAMP7;PSG1;PSG10P;PSG6;PSG7;PSG8;PSG8-AS1	200000	1KG
chr20	13400001	13500000	0.0262428	TASP1	100000	ChinaMAP
chr20	26100001	26200000	0.0201397	AL121904.1;AL121904.2;AL391119.1;MIR663AHG;NCOR1P1	100000	1KG
chr20	26300001	26400000	0.0247057	.	100000	1KG
chr20	31500001	31700000	0.0404999	AL110115.1;AL110115.2;BCL2L1;BCL2L1-AS1;COX4I2;HM13;HM13-AS1;HM13-IT1;ID1;MCTS2P;MIR3193;RNU6-384P	200000	1KG
chr22	28400001	28500000	0.0236957	MIR5739;TTC28	100000	1KG
chr22	28600001	28700000	0.0235234	CHEK2;RN7SL162P;TTC28	100000	1KG
chr22	32000001	32100000	0.0477987	LINC02558;SLC5A1;Z74021.1	100000	CHN100k
chr22	34500001	34600000	0.0232438	AL021877.1	100000	1KG
chr22	35700001	35800000	0.0651867	APOL5;MRPS16P3;RBFOX2	100000	1KG
*Consecutive windows were merged in the table

## Sheet: Supplementary Table 11
Supplementary Table 11 Regions with poor imputation quality identified in the Chinese dataset.
Window_chr	Window_start	Window_end	Mean IQS	Genes within the region	Combined_window_length*	Panel with the best performance	Shared with the Thai dataset
chr1	12800001	12900000	0.317982	HNRNPCL1;LINC01784;PRAMEF10;PRAMEF11;PRAMEF2;PRAMEF30P;PRAMEF4	100000	CHN100k	Yes
chr1	13300001	13400000	0.323544	AC243961.1;PRAMEF14;PRAMEF15;PRAMEF17;PRAMEF19;PRAMEF33	100000	ChinaMAP	No
chr1	16600001	16700000	0.397963	AL021920.2;AL137798.1;AL137798.2;AL137798.3;CROCCP2;EIF1AXP1;ESPNP;MST1P2;NBPF1;RNU1-3	100000	TOPMed	No
chr1	150000001	150500000	0.348038	AC242988.1;AC242988.2;AC244033.1;AC244033.2;ANP32E;APH1A;C1orf54;CA14;CIART;MIR6878;MRPS21;OTUD7B;PLEKHO1;PRPF3;RN7SL480P;RNU2-17P;RPRD2;TARS2;VPS45	500000	1KG	Yes
chr1	206000001	206200000	0.338196	AC244035.1;AC244035.2;AC244035.3;AC244035.4;AVPR1B;BX571818.1;CTSE;FAM72A;RAB7B;RHEX;RPL22P4	200000	ChinaMAP	Yes
chr1	245300001	245400000	0.3854	KIF26B	100000	WBBC	Yes
chr1	245600001	245700000	0.390609	AC104462.1;AC104462.2;KIF26B	100000	ChinaMAP	No
chr2	7800001	7900000	0.37113	AC007463.1	100000	ChinaMAP	No
chr2	87600001	87900000	0.315422	AC133644.2;ANAPC1P4;CYTOR;MIR4435-1;MTATP8P2;PLGLB2;RGPD2;RPS14P5	300000	ChinaMAP	Yes
chr2	88900001	89300000	0.332069	AC244255.1;IGKV1-12;IGKV1-13;IGKV1-16;IGKV1-17;IGKV1-22;IGKV1-27;IGKV1-32;IGKV1-33;IGKV1-35;IGKV1-37;IGKV1-5;IGKV1-6;IGKV1-8;IGKV1-9;IGKV2-10;IGKV2-14;IGKV2-18;IGKV2-19;IGKV2-23;IGKV2-24;IGKV2-26;IGKV2-28;IGKV2-29;IGKV2-30;IGKV2-36;IGKV2-4;IGKV3-11;IGKV3-15;IGKV3-20;IGKV3-25;IGKV3-31;IGKV3-34;IGKV3-7;IGKV6-21;IGKV7-3;PGBD4P5	400000	ChinaMAP	Yes
chr2	89700001	89800000	0.286518	.	100000	WBBC	No
chr2	89900001	90200000	0.307443	IGKV1D-12;IGKV1D-13;IGKV1D-16;IGKV1D-17;IGKV1D-22;IGKV1D-27;IGKV1D-32;IGKV1D-33;IGKV1D-42;IGKV2D-10;IGKV2D-14;IGKV2D-18;IGKV2D-19;IGKV2D-23;IGKV2D-24;IGKV2D-26;IGKV2D-28;IGKV2D-29;IGKV2D-30;IGKV3D-11;IGKV3D-15;IGKV3D-20;IGKV3D-25;IGKV3D-31;IGKV3D-34;IGKV6D-21;IGKV6D-41	300000	WBBC	Yes
chr2	111300001	111400000	0.395582	AC068491.1;MIR4435-2;MIR4435-2HG	100000	CHN100k	No
chr2	132200001	132300000	0.380881	AC097532.1;ANKRD30BL;CDC27P1;MIR663B;RNA5-8SP5	100000	CHN100k	Yes
chr3	173300001	173400000	0.395455	AC068759.1;NLGN1	100000	ChinaMAP	No
chr3	197500001	197600000	0.352737	AC132008.1;AC132008.2;BDH1;LINC02012	100000	1KG	Yes
chr4	49600001	49700000	0.271581	.	100000	WBBC	No
chr5	1000001	1100000	0.314899	AC116351.2;MIR4635;NKD2;SLC12A7	100000	ChinaMAP	Yes
chr5	1300001	1400000	0.390489	AC026748.1;AC026748.3;CLPTM1L;LINC01511;MIR4457;MTCO2P32;SLC6A3	100000	ChinaMAP	No
chr5	176000001	176100000	0.380862	AC139491.1;AC139491.3;AC139491.7;FAM153B;OR1X1P;THOC3	100000	1KG	No
chr6	68300001	68400000	0.367191	AL606923.2;LINC02549	100000	ChinaMAP	No
chr7	60900001	61300000	0.339025	.	400000	1KG	No
chr7	61700001	61800000	0.37664	.	100000	TOPMed	No
chr7	142200001	142600000	0.342253	AC245088.1;AC245088.2;MGAM2;MOXD2P;PRSS3P3;PRSS58;TRBV1;TRBV10-1;TRBV10-2;TRBV10-3;TRBV11-1;TRBV11-2;TRBV11-3;TRBV12-1;TRBV12-2;TRBV12-3;TRBV12-4;TRBV12-5;TRBV13;TRBV14;TRBV15;TRBV16;TRBV2;TRBV3-1;TRBV4-1;TRBV4-2;TRBV5-1;TRBV5-2;TRBV5-3;TRBV5-4;TRBV5-5;TRBV5-6;TRBV5-7;TRBV6-1;TRBV6-2;TRBV6-4;TRBV6-5;TRBV6-6;TRBV6-7;TRBV6-8;TRBV7-1;TRBV7-2;TRBV7-3;TRBV7-4;TRBV7-5;TRBV7-6;TRBV7-7;TRBV7-9;TRBV8-1;TR…	400000	1KG	Yes
chr7	142700001	142900000	0.288852	AC244472.1;AC245427.1;AC245427.2;EPHB6;PGBD4P1;PRSS1;PRSS2;PRSS3P1;TRBC1;TRBC2;TRBD1;TRBJ1-1;TRBJ1-2;TRBJ1-3;TRBJ1-4;TRBJ1-5;TRBJ1-6;TRBJ2-1;TRBJ2-2;TRBJ2-2P;TRBJ2-3;TRBJ2-4;TRBJ2-5;TRBJ2-6;TRBJ2-7;TRBV27;TRBV28;TRBV29-1;TRBV30;TRBVB;TRPV6;WBP1LP1	200000	WBBC	Yes
chr7	148200001	148400000	0.399528	AC083849.1;CNTNAP2	200000	ChinaMAP	No
chr8	700001	1000000	0.348954	AC026950.2;AC100797.1;AC100797.5;DLGAP2;ERICH1	300000	ChinaMAP	Yes
chr8	1100001	1400000	0.308676	AC110288.1;AF067845.1;AF067845.2;AF067845.4;AF067845.5;DLGAP2	300000	1KG	Yes
chr8	1700001	1900000	0.205302	AC019257.8;AC100810.1;AC100810.2;AC100810.3;AC100810.6;AC100810.7;ARHGEF10;CLN8;DLGAP2;MIR3674;MIR596	200000	CHN100k	Yes
chr8	2000001	2700000	0.289149	AC245123.1;AC245164.1;AC245164.2;AC245187.1;AC245187.2;AC245519.1;AC245519.2;AC246817.2;KBTBD11;MIR7160;MYOM2	700000	CHN100k	Yes
chr8	39500001	39600000	0.343587	AC123767.1;ADAM18;ADAM3A	100000	ChinaMAP	Yes
chr8	39700001	39800000	0.36176	ADAM18;ADAM2	100000	ChinaMAP	Yes
chr8	69300001	69500000	0.374403	AC022790.1;LINC01603;SULF1	200000	ChinaMAP	Yes
chr9	39000001	39100000	0.284985	CNTNAP3;VN2R3P	100000	WBBC	Yes
chr9	39300001	39600000	0.313744	BX005214.1;BX005214.2;BX005214.3;FAM74A1;SKP1P3;SPATA31A1;ZNF658B	300000	WBBC	No
chr9	60500001	60600000	0.31337	BX088702.1	100000	WBBC	No
chr9	61300001	61400000	0.283678	CNTNAP3C	100000	WBBC	No
chr9	61600001	61800000	0.301737	AL935212.1;AL935212.2;AL935212.3;FAM242D;RN7SL722P	200000	WBBC	No
chr9	62000001	62200000	0.294117	FAM27C	200000	WBBC	No
chr9	63900001	64200000	0.355965	AL163540.1;AL163540.2	300000	WBBC	No
chr9	64800001	65100000	0.374348	AC125634.1;AL359955.1;BNIP3P4;RNU6-1293P	300000	WBBC	No
chr9	65300001	65600000	0.335334	CBWD4P;FP326651.1;FP326651.2	300000	WBBC	No
chr9	66600001	66700000	0.29654	RAB28P4;RBPJP2	100000	WBBC	No
chr9	66900001	67300000	0.33088	AL162233.1;AL353770.1;AL353770.2;AL353770.3;AL353770.4;CNTNAP3P2;FAM74A3;RBM17P2;RN7SL422P;SPATA31A3;ZNF658	400000	WBBC	No
chr9	67700001	67800000	0.375071	AL627230.1;AL627230.3;AL627230.4;AL627230.5;FAM27B;FAM27E3;RN7SL787P	100000	TOPMed	No
chr9	68200001	68300000	0.376628	AL353608.2;AL353608.4;CBWD3	100000	CHN100k	No
chr10	42200001	42300000	0.0845529	AL031601.1;AL031601.2;PABPC1P8	100000	WBBC	No
chr10	46400001	46500000	0.379345	AC244230.2;HNRNPA1P33;LINC00842;NPY4R	100000	ChinaMAP	Yes
chr10	46700001	47600000	0.370719	AGAP13P;AGAP9;AL591684.1;AL591684.2;AL591684.3;AL731733.1;ANXA8;BMS1P1;BMS1P2;BX547991.1;BX547991.2;CTSLP2;CTSLP3;FAM245B;FAM25G;FRMPD2B;GDF10;GDF2;GLUD1P2;LINC02675;PTPN20;RBP3;RNA5SP311;RNA5SP312;ZNF488	900000	ChinaMAP	Yes
chr10	47700001	47800000	0.350182	FO681492.1;RHEBP2;SHLD2P3	100000	WBBC	No
chr10	48000001	48100000	0.311756	AGAP12P;BMS1P7;PTPN20CP;RNA5SP315	100000	CHN100k	No
chr12	10800001	10900000	0.367309	AC006518.1;AC006518.2;AC018630.2;PRH1;PRR4;TAS2R10;TAS2R7;TAS2R8;TAS2R9	100000	ChinaMAP	No
chr12	11300001	11400000	0.392961	AC078950.1;PRB1;PRB2;PRB4	100000	ChinaMAP	No
chr13	18400001	18500000	0.365777	BNIP3P7;FO681491.1;FO681491.2;ZNF962P	100000	TOPMed	No
chr13	104900001	105000000	0.380605	.	100000	ChinaMAP	No
chr13	111700001	111800000	0.325216	.	100000	ChinaMAP	No
chr13	112200001	112400000	0.343399	LINC01043;LINC01044;LINC01070;SPACA7	200000	1KG	Yes
chr14	94300001	94400000	0.344316	SERPINA1;SERPINA2;SERPINA6	100000	CHN100k	No
chr15	22600001	23100000	0.266661	AC011767.1;AC138649.1;AC138649.2;AC138649.3;AC138649.4;AC138649.5;CYFIP1;ELMO2P1;GOLGA8IP;NIPA1;NIPA2;PDCD6IPP1;RN7SL495P;TUBGCP5;WHAMMP3	500000	ChinaMAP	Yes
chr15	23300001	23400000	0.31258	AC100756.1;AC100756.3;AC242376.2;GOLGA8S;RN7SL536P	100000	ChinaMAP	Yes
chr15	25000001	25100000	0.38635	AC124312.1;AC124312.2;AC124312.3;AC124312.4;AC124312.5;SNHG14;SNORD109A;SNORD116-1;SNORD116-10;SNORD116-11;SNORD116-12;SNORD116-13;SNORD116-14;SNORD116-15;SNORD116-16;SNORD116-17;SNORD116-18;SNORD116-19;SNORD116-2;SNORD116-20;SNORD116-21;SNORD116-22;SNORD116-23;SNORD116-24;SNORD116-25;SNORD116-26;SNORD116-3;SNORD116-4;SNORD116-5;SNORD116-6;SNORD116-7;SNORD116-8;SNORD116-9	100000	ChinaMAP	No
chr15	27900001	28300000	0.324112	HERC2;OCA2	400000	ChinaMAP	Yes
chr15	28700001	28800000	0.226919	AC055876.1;AC055876.3;AC055876.4;GOLGA8M;PDCD6IPP2;RN7SL719P;WHAMMP2	100000	CHN100k	Yes
chr15	28900001	29500000	0.332315	AC061965.1;AC061965.2;AC107980.1;AC127522.1;APBA2;FAM189A1;NSMCE3	600000	SEAD	Yes
chr15	29600001	30100000	0.346379	AC022613.1;AC022613.2;AC022613.3;AC102941.1;AC102941.2;AC111152.1;AC111152.2;AC111152.3;DNM1P28;GOLGA8J;HMGN2P5;NCAPGP2;RN7SL673P;TJP1;TUBBP8	500000	1KG	Yes
chr15	30600001	30900000	0.271687	AC026150.4;AC087481.1;AC087481.2;AC091057.1;AC091057.2;AC091057.3;AC091057.4;AC091057.5;AC091057.6;ARHGAP11B;FAN1;GOLGA8H;GOLGA8UP;HERC2P10;RN7SL628P;RN7SL82P;ULK4P2	300000	1KG	Yes
chr15	31000001	31100000	0.369363	AC009562.1;MIR211;TRPM1	100000	ChinaMAP	Yes
chr15	31200001	32200000	0.332216	AC012236.1;AC026951.1;AC026951.2;AC068448.1;AC068448.2;AC079969.1;AC104759.1;CHRNA7;KLF13;LINC02352;OTUD7A;UBE2CP4	1000000	1KG	Yes
chr15	32600001	32900000	0.199487	AC090877.1;AC090877.2;AC123768.1;AC123768.2;AC123768.3;AC123768.5;ARHGAP11A;FMN1;GOLGA8N;GREM1;RN7SL286P;SCG5	300000	TOPMed	Yes
chr16	2100001	2200000	0.398979	AC009065.1;AC009065.10;AC009065.4;AC009065.7;CASKIN1;MIR3180-5;MIR4516;MIR6511B1;PKD1;RAB26;SNHG19;SNORD60;TRAF7	100000	ChinaMAP	No
chr16	14400001	14500000	0.324203	AC040173.2;PARN	100000	ChinaMAP	No
chr16	15000001	15100000	0.352793	AC138932.6;AC139256.2;MIR1972-1;NTAN1;PDXDC1;RRN3	100000	TOPMed	Yes
chr16	15400001	15600000	0.338805	AC140504.1;BMERB1;MARF1;MPV17L	200000	1KG	Yes
chr16	15800001	15900000	0.370021	AC130651.1;FOPNL;MYH11;RNU6-213P	100000	TOPMed	Yes
chr16	16000001	16300000	0.207842	ABCC1;ABCC6;AC136624.1;AC136624.2;AC136624.3;NOMO3;RPL17P40	300000	ChinaMAP	Yes
chr16	16700001	16900000	0.295802	AC092326.1	200000	SEAD	Yes
chr16	18100001	18300000	0.354753	AC008785.1;AC010601.1;AC091489.1;AC091489.2	200000	ChinaMAP	Yes
chr16	18500001	18600000	0.347861	ABCC6P1;AC136618.1;AC136618.2;NOMO2	100000	ChinaMAP	Yes
chr16	18700001	18800000	0.350172	AC138811.2;ARL6IP1;RPS15A	100000	1KG	No
chr16	32500001	32700000	0.399726	AC133569.1;AC137800.1;AC137800.2;AC138907.1;AC138907.3;AC138907.5;AC138907.7;TP53TG3	200000	ChinaMAP	No
chr16	32800001	33000000	0.340947	AC137761.1;AC137761.2;AC142086.1;AC142086.2;AC142086.3;AC142086.4;AC142086.5;AC142086.6;BCAP31P2;IGHV1OR16-2;IGHV2OR16-5;IGHV3OR16-10;IGHV3OR16-15;IGHV3OR16-6;SLC6A10P	200000	1KG	No
chr16	33600001	34300000	0.302604	AC133561.1;AC133561.2;AC133561.3;AC133561.4;AC136428.1;AC136428.2;AC136428.3;AC136428.4;AC136932.1;AC140658.1;AC140658.2;AC140658.3;AC140658.4;AC140658.5;AC140658.6;AC140658.7;AC142384.1;ARHGAP23P1;BCAP31P1;BCLAF1P2;BMS1P8;DUX4L45;DUX4L46;DUX4L47;ENPP7P13;IGHV3OR16-11;IGHV3OR16-12;IGHV3OR16-13;IGHV3OR16-16;IGHV3OR16-7;LINC00273;PCMTD1P2;RNA5-8SP2	700000	ChinaMAP	Yes
chr16	34600001	35000000	0.324966	AC135776.4;AC135776.5;LINC02184	400000	1KG	Yes
chr16	35900001	36300000	0.380943	AC116553.2;PPP1R1AP2	400000	1KG	Yes
chr17	1000001	1200000	0.251539	ABR;AC015884.3;AC016292.1;AC016292.2;MIR3183;TIMM22	200000	ChinaMAP	Yes
chr17	21500001	21900000	0.392887	AC233702.1;AC233702.2;AC233702.3;AC233702.4;AC233702.5;AC233702.6;AC233702.7;AC233702.8;AC233702.9;AC243725.1;KCNJ18;LINC02693;RPL21P120	400000	TOPMed	No
chr17	36000001	36100000	0.297086	AC243829.4;AC244100.3;AC244100.4;CCL15;CCL15-CCL14;CCL18;CCL23;CCL3	100000	WBBC	No
chr17	36600001	37300000	0.254311	AATF;AC243773.1;AC243773.2;AC243830.1;AC243830.2;AC243830.3;AC244093.1;AC244093.2;AC244093.3;AC244093.4;AC244093.5;ACACA;DHRS11;HMGB1P24;LHX1;LHX1-DT;MIR2909;MRM1	700000	1KG	No
chr17	37400001	37900000	0.293654	AC243571.1;AC243571.2;AC243585.1;AC243585.2;AC243654.1;AC243654.2;ACACA;DDX52;DUSP14;HNF1B;MIR378J;SYNRG;TADA2A;YWHAEP7	500000	1KG	No
chr17	38200001	38600000	0.282763	AC244153.1;AC244154.1;ARHGAP23;GPR179;MRPL45;NPEPPSP1;SOCS7;SRCIN1	400000	WBBC	No
chr17	45800001	46300000	0.285977	AC005829.1;AC005829.2;AC217773.1;ARL17B;CR936218.1;CR936218.2;CR936218.3;CRHR1;KANSL1;KANSL1-AS1;LINC02210-CRHR1;LRRC37A;MAPK8IP1P1;MAPT;MAPT-AS1;MAPT-IT1;SPPL2C;STH	500000	ChinaMAP	Yes
chr17	79500001	79600000	0.370966	AC233701.1;RBFOX3	100000	ChinaMAP	No
chr18	15100001	15500000	0.361619	AP005242.1;AP005242.5;AP005901.1;AP005901.2;AP005901.3;AP005901.4;AP005901.5;AP005901.6;BNIP3P3;RNU6-721P	400000	WBBC	Yes
chr19	2800001	3000000	0.370171	AC006130.1;AC006130.2;AC006130.3;AC006277.1;AC119403.1;AC119403.2;THOP1;TLE2;TLE6;ZNF554;ZNF555;ZNF556;ZNF57;ZNF77	200000	1KG	No
chr19	54000001	54300000	0.350909	AC012314.9;AC245052.1;AC245052.2;AC245052.3;AC245052.4;AC245052.5;AC245052.6;AC245052.7;AC245884.12;AC245884.5;AC245884.7;CACNG6;CNOT3;LENG1;LILRA6;LILRB2;LILRB3;LILRB5;MBOAT7;MIR4752;NDUFA3;OSCAR;PRPF31;RNU6-1307P;RPS9;TARM1;TFPT;TMC4;TSEN34;VSTM1	300000	CHN100k	Yes
chr19	54500001	54600000	0.297052	AC245036.1;AC245036.2;AC245036.5;KIR3DX1;LAIR2;LILRA1;LILRA2	100000	ChinaMAP	Yes
chr19	55000001	55100000	0.380854	AC011476.2;AC011476.3;EPS8L1;GP6;NLRP2;PPP1R12C;RDH13	100000	WBBC	No
chr20	30100001	30200000	0.358397	.	100000	ChinaMAP	No
chr20	30400001	31000000	0.380297	AC018688.1;AC018688.2;AC092107.1;ANKRD20A21P;MLLT10P1;RNA5SP528	600000	1KG	Yes
chr20	31100001	31200000	0.366534	.	100000	TOPMed	No
chr21	13100001	13200000	0.330563	AJ239321.1;ZNF355P	100000	WBBC	No
chr21	13700001	13800000	0.199571	AL050303.1;FAM207CP;FEM1AP1;LONRF2P5;MIR8069-2;TERF1P1	100000	CHN100k	No
chr21	13900001	14000000	0.395793	ANKRD20A11P;RHOT1P2;RNU6-954P;SNX18P13	100000	CHN100k	Yes
chr21	36500001	36600000	0.382895	AP000695.2;AP000696.2;AP000696.3;CLDN14	100000	ChinaMAP	No
chr22	16300001	16400000	0.311118	ABCD1P4	100000	1KG	Yes
chr22	21100001	21200000	0.375457	AP000550.1;AP000550.2;AP000550.4;BCRP2;E2F6P2;FAM230B;POM121L7P	100000	ChinaMAP	No
chr22	21300001	21500000	0.35298	AP000552.1;AP000552.2;AP000552.3;AP000552.4;AP000552.5;AP000552.6;AP000557.3;FAM230H;HIC2;LINC01651;PI4KAP2;PPP1R26P5;RIMBP3B;RN7SKP63;TMEM191C	200000	CHN100k	No
chr22	22300001	22500000	0.362086	AC245060.1;AC245060.4;AC245060.7;AC245291.1;AC245291.2;AC245291.3;ASH2LP1;ASH2LP2;ASH2LP3;IGLV1-36;IGLV1-40;IGLV1-41;IGLV1-44;IGLV1-47;IGLV1-50;IGLV1-51;IGLV5-37;IGLV5-45;IGLV5-48;IGLV5-52;IGLV7-35;IGLV7-43;IGLV7-46;IGLV9-49;IGLVI-38;IGLVI-42;IGLVVII-41-1;ZNF280B	200000	ChinaMAP	Yes
chr22	22600001	22900000	0.312467	AC244157.1;AC244157.2;AC244250.1;AC244250.2;AC244250.3;AC244250.4;AC245028.1;AC245028.2;AC245028.3;BCRP4;GGTLC2;IGLC1;IGLJ1;IGLJ2;IGLL5;IGLV2-11;IGLV2-14;IGLV2-18;IGLV2-23;IGLV2-28;IGLV2-5;IGLV2-8;IGLV3-1;IGLV3-10;IGLV3-12;IGLV3-13;IGLV3-15;IGLV3-16;IGLV3-17;IGLV3-19;IGLV3-2;IGLV3-21;IGLV3-22;IGLV3-24;IGLV3-25;IGLV3-26;IGLV3-27;IGLV3-29;IGLV3-30;IGLV3-31;IGLV3-4;IGLV3-6;IGLV3-7;IGLV3-9;IGLV4-3;IG…	300000	WBBC	Yes
chr22	26800001	26900000	0.384201	LINC01422;Z97353.1	100000	ChinaMAP	No
*Consecutive windows were merged in the table

## Sheet: Supplementary Table 12
Supplementary Table 12 Regions with poor imputation quality identified in the Thai dataset.
Window_chr	Window_start	Window_end	Mean IQS	Genes within the region	Combined_window_length*	Panel with the best performance	Shared with the Chinese dataset
chr1	12800001	12900000	0.384719	HNRNPCL1;LINC01784;PRAMEF10;PRAMEF11;PRAMEF2;PRAMEF30P;PRAMEF4	100000	ChinaMAP	Yes
chr1	16800001	16900000	0.362249	BX284668.1;BX284668.2;BX284668.3;BX284668.4;BX284668.5;CROCC;MIR3675;RNU1-2;RNU1-5P	100000	WBBC	No
chr1	26900001	27000000	0.383086	AL356390.1;GPATCH3;KDF1;NR0B2;NUDC;OSTCP2;RPL12P13;TRNP1	100000	TOPMed	No
chr1	150100001	150500000	0.37826	AC242988.1;AC242988.2;ANP32E;APH1A;C1orf54;CA14;CIART;MIR6878;MRPS21;PLEKHO1;PRPF3;RN7SL480P;RNU2-17P;RPRD2;TARS2;VPS45	400000	1KG	Yes
chr1	153700001	153800000	0.290685	AL513523.1;AL513523.2;AL513523.4;AL513523.5;AL513523.6;GATAD2B;GEMIN2P1;INTS3;RN7SL372P;SLC27A3	100000	SEAD	No
chr1	189400001	189500000	0.307978	.	100000	TOPMed	No
chr1	206000001	206200000	0.354057	AC244035.1;AC244035.2;AC244035.3;AC244035.4;AVPR1B;BX571818.1;CTSE;FAM72A;RAB7B;RHEX;RPL22P4	200000	SEAD	Yes
chr1	245300001	245400000	0.357011	KIF26B	100000	ChinaMAP	Yes
chr2	72200001	72300000	0.361132	EXOC6B;RPS15AP13	100000	TOPMed	No
chr2	87700001	87900000	0.298002	AC133644.2;ANAPC1P4;MTATP8P2;PLGLB2;RGPD2	200000	TOPMed	Yes
chr2	88900001	89100000	0.264343	IGKV1-12;IGKV1-13;IGKV1-16;IGKV1-5;IGKV1-6;IGKV1-8;IGKV1-9;IGKV2-10;IGKV2-14;IGKV2-4;IGKV3-11;IGKV3-15;IGKV3-7;IGKV7-3;PGBD4P5	200000	TOPMed	Yes
chr2	89200001	89300000	0.388354	AC244255.1;IGKV1-27;IGKV1-32;IGKV1-33;IGKV1-35;IGKV1-37;IGKV2-28;IGKV2-29;IGKV2-30;IGKV2-36;IGKV3-31;IGKV3-34	100000	1KG	Yes
chr2	89900001	90100000	0.0307381	IGKV1D-17;IGKV1D-22;IGKV1D-27;IGKV1D-32;IGKV1D-33;IGKV2D-18;IGKV2D-19;IGKV2D-23;IGKV2D-24;IGKV2D-26;IGKV2D-28;IGKV2D-29;IGKV2D-30;IGKV3D-20;IGKV3D-25;IGKV3D-31;IGKV3D-34;IGKV6D-21;IGKV6D-41	200000	SEAD	Yes
chr2	111400001	111500000	0.37355	AC017002.3;AC017002.4;MIR4435-2HG;SOCAR	100000	TOPMed	No
chr2	131700001	131800000	0.393541	AC093724.1;C2orf27A;C2orf27B;TOMM40P4	100000	1KG	No
chr2	132200001	132300000	0.379127	AC097532.1;ANKRD30BL;CDC27P1;MIR663B;RNA5-8SP5	100000	CHN100k	Yes
chr3	19100001	19200000	0.392027	KCNH8	100000	TOPMed	No
chr3	75600001	75700000	0.380128	AC108724.2;AGGF1P3;CLUHP10;DUX4L26;FRG2C;LINC00960;MIR1324;RARRES2P1;RPL23AP49;UNC93B3;ZNF717	100000	CHN100k	No
chr3	197500001	197700000	0.396748	AC024560.1;AC024560.2;AC024560.3;AC024560.4;AC024560.5;AC132008.1;AC132008.2;BDH1;LINC02012;MIR922;RUBCN	200000	1KG	Yes
chr4	42000001	42100000	0.375086	ATP1B1P1;SLC30A9	100000	WBBC	No
chr4	68200001	68300000	0.396414	AC098799.1;AC098799.3;FTLP10;TMPRSS11B;TMPRSS11BNL	100000	TOPMed	No
chr4	189500001	189700000	0.258122	LINC01262	200000	TOPMed	No
chr5	1000001	1100000	0.258077	AC116351.2;MIR4635;NKD2;SLC12A7	100000	1KG	Yes
chr5	33800001	33900000	0.378622	ADAMTS12;RNU6-923P	100000	TOPMed	No
chr7	142300001	142600000	0.264956	TRBV10-1;TRBV10-2;TRBV10-3;TRBV11-1;TRBV11-2;TRBV11-3;TRBV12-1;TRBV12-2;TRBV12-3;TRBV12-4;TRBV12-5;TRBV13;TRBV14;TRBV15;TRBV16;TRBV2;TRBV3-1;TRBV4-1;TRBV4-2;TRBV5-1;TRBV5-2;TRBV5-3;TRBV5-4;TRBV5-5;TRBV5-6;TRBV5-7;TRBV6-1;TRBV6-2;TRBV6-4;TRBV6-5;TRBV6-6;TRBV6-7;TRBV6-8;TRBV7-1;TRBV7-2;TRBV7-3;TRBV7-4;TRBV7-5;TRBV7-6;TRBV7-7;TRBV7-9;TRBV8-1;TRBV8-2;TRBV9	300000	ChinaMAP	Yes
chr7	142700001	142900000	0.321368	AC244472.1;AC245427.1;AC245427.2;EPHB6;PGBD4P1;PRSS1;PRSS2;PRSS3P1;TRBC1;TRBC2;TRBD1;TRBJ1-1;TRBJ1-2;TRBJ1-3;TRBJ1-4;TRBJ1-5;TRBJ1-6;TRBJ2-1;TRBJ2-2;TRBJ2-2P;TRBJ2-3;TRBJ2-4;TRBJ2-5;TRBJ2-6;TRBJ2-7;TRBV27;TRBV28;TRBV29-1;TRBV30;TRBVB;TRPV6;WBP1LP1	200000	ChinaMAP	Yes
chr7	157700001	157800000	0.346892	AC006003.1;PTPRN2	100000	TOPMed	No
chr8	800001	1000000	0.218161	AC026950.2;DLGAP2	200000	TOPMed	Yes
chr8	1200001	1300000	0.286502	AC110288.1;AF067845.2;DLGAP2	100000	SEAD	Yes
chr8	1700001	1900000	0.21522	AC019257.8;AC100810.1;AC100810.2;AC100810.3;AC100810.6;AC100810.7;ARHGEF10;CLN8;DLGAP2;MIR3674;MIR596	200000	CHN100k	Yes
chr8	2000001	2700000	0.253264	AC245123.1;AC245164.1;AC245164.2;AC245187.1;AC245187.2;AC245519.1;AC245519.2;AC246817.2;KBTBD11;MIR7160;MYOM2	700000	ChinaMAP	Yes
chr8	7100001	7200000	0.327704	AF228730.2;AF228730.5;RPS3AP30;RPS3AP33;SNRPCP15;SNRPCP6	100000	ChinaMAP	No
chr8	12300001	12400000	0.359837	AC087203.1;AC087203.2;DEFB108E;DEFB109A;DEFB130A;FAM66A;RNA5SP254;ZNF705CP	100000	TOPMed	No
chr8	12600001	12700000	0.288417	AC068587.1;AC068587.3;AC068587.4;AC068587.5;AC068587.6;AC068587.7;AC068587.8;OR7E15P;OR7E8P;RPS3AP35	100000	WBBC	No
chr8	35600001	35700000	0.389225	AC105230.1;UNC5D	100000	TOPMed	No
chr8	37600001	37700000	0.395538	AC137579.1;AC137579.2;RNU6-607P;ZNF703	100000	TOPMed	No
chr8	37800001	37900000	0.367448	AC130304.1;ADGRA2;BRF2;RAB11FIP1	100000	CHN100k	No
chr8	39100001	39400000	0.242393	AC105185.1;ADAM32;ADAM5;ADAM9;RPL3P10	300000	1KG	No
chr8	39500001	39800000	0.277153	AC123767.1;ADAM18;ADAM2;ADAM3A	300000	1KG	Yes
chr8	40200001	40300000	0.32824	SIRLNT	100000	TOPMed	No
chr8	57200001	57300000	0.360837	AC025674.1;AC025674.2;LINC00588;LINC01606;RNU6-596P	100000	WBBC	No
chr8	60900001	61000000	0.362661	AC022182.1;AC022182.2;AC022182.3;AC113143.2;IFITM3P8	100000	1KG	No
chr8	65100001	65300000	0.353653	LINC00251;RPL31P41	200000	TOPMed	No
chr8	66600001	67300000	0.398612	AC087359.1;AC090154.1;AC110998.1;ARFGEF1;C8orf44;C8orf44-SGK3;COPS5;CSPP1;MCMDC2;MYBL1;PPP1R42;PTTG3P;RNA5SP268;SGK3;SNHG6;SNORD87;TCF24;VCPIP1	700000	1KG	No
chr8	68700001	68900000	0.371153	AC083967.1;C8orf34;LINC01592	200000	TOPMed	No
chr8	69300001	69500000	0.352476	AC022790.1;LINC01603;SULF1	200000	ChinaMAP	Yes
chr8	81200001	81300000	0.377645	AC009902.1;AC009902.2;AC009902.3;FABP5;UBE2HP1	100000	TOPMed	No
chr8	82800001	82900000	0.368851	AC060765.2;AC105031.2	100000	ChinaMAP	No
chr8	86800001	87000000	0.342293	AC090572.2;CNBD1	200000	1KG	No
chr8	92100001	92600000	0.37854	AC022695.1;AC022695.2;AC022695.3;AC091096.1;AC104339.1;RUNX1T1	500000	ChinaMAP	No
chr8	94000001	94300000	0.383964	AP003351.1;AP003478.1;CDH17;GEM	300000	TOPMed	No
chr8	95200001	95400000	0.385052	C8orf37;C8orf37-AS1;LINC01298	200000	1KG	No
chr8	95700001	95900000	0.365613	C8orf37-AS1	200000	ChinaMAP	No
chr8	96500001	96700000	0.359129	CPQ;SDC2	200000	1KG	No
chr8	96800001	97100000	0.306059	CPQ	300000	TOPMed	No
chr8	97500001	97600000	0.389026	.	100000	TOPMed	No
chr8	98200001	98700000	0.32379	AP003355.1;AP003355.2;AP003355.3;AP003467.1;AP003467.2;KCNS2;NIPAL2;RNU6-748P;STK3	500000	TOPMed	No
chr8	143600001	143700000	0.382626	AC067930.2;LINC02878;PYCR3;TIGD5;TSTA3;ZNF623;ZNF707	100000	ChinaMAP	No
chr9	100001	200000	0.344426	AL158832.2;AL449043.1;CBWD1;FOXD4;LINC01388	100000	1KG	No
chr9	17500001	17600000	0.375696	CNTLN;PABPC1P11;SH3GL2	100000	ChinaMAP	No
chr9	19300001	19400000	0.399839	AL391834.1;AL391834.2;AL391834.3;DENND4C;NDUFA5P3;RPS6	100000	1KG	No
chr9	39000001	39200000	0.236635	AL353729.1;AL353729.2;CNTNAP3;RBM17P1;RN7SL640P;VN2R3P	200000	1KG	Yes
chr9	63800001	63900000	0.373616	CR786580.1;DUX4L50;FRG1JP;MIR4477B;RNA5SP284	100000	WBBC	No
chr9	68300001	68400000	0.382929	AL161457.2;AL353608.1;AL353608.3;CBWD3;FOXD4L3;PGM5;PGM5-AS1	100000	1KG	No
chr9	72200001	72600000	0.36229	AL135924.1;AL135924.2;AL445646.1;AL596448.1;GDA;LINC01504;RNA5SP285;TMC1;ZFAND5	400000	ChinaMAP	No
chr9	74100001	74200000	0.385834	.	100000	ChinaMAP	No
chr9	79900001	80000000	0.35948	AL161782.1;AL161912.4	100000	CHN100k	No
chr9	80200001	80300000	0.369209	.	100000	SEAD	No
chr9	83000001	83100000	0.366954	AL499602.1;RASEF	100000	TOPMed	No
chr9	85700001	85800000	0.390698	AGTPBP1;AL157882.1;AL353743.2;AL353743.4	100000	TOPMed	No
chr9	88100001	88200000	0.346294	AL353726.1;AL353726.2;AL451142.1;AL451142.2;SPATA31C2	100000	TOPMed	No
chr9	101300001	101400000	0.293262	ACNATP;AL359893.1;AL359893.2;BAAT;FYTTD1P1;MRPL50;PLPPR1;TRMT112P4;ZNF189	100000	TOPMed	No
chr9	108200001	108300000	0.376031	AL353742.1	100000	TOPMed	No
chr9	119400001	119500000	0.352177	AC006288.1	100000	TOPMed	No
chr9	128400001	128500000	0.395115	AL359091.2;AL359091.4;CERCAM;ODF2;ODF2-AS1	100000	ChinaMAP	No
chr9	130700001	130800000	0.305973	ABL1;AL359092.1;AL359092.3;EXOSC2	100000	1KG	No
chr9	134500001	134600000	0.398313	AL669970.1;AL669970.2;AL669970.3	100000	SEAD	No
chr9	137800001	137900000	0.387024	AL772363.1;CACNA1B;EHMT1;MIR602	100000	TOPMed	No
chr10	17800001	17900000	0.394505	AC069023.1;MIR511;MRC1;TMEM236	100000	CHN100k	No
chr10	46400001	46500000	0.336062	AC244230.2;HNRNPA1P33;LINC00842;NPY4R	100000	ChinaMAP	Yes
chr10	47000001	47100000	0.257023	PTPN20	100000	1KG	Yes
chr11	3400001	3500000	0.348172	AC127526.1;AC127526.2;AC127526.3;AC127526.5;FAM86GP;TSSC2	100000	TOPMed	No
chr12	8400001	8500000	0.38804	AC092865.1;AC092865.2;CLEC6A;OR7E140P;OR7E148P;OR7E149P;RNU6-275P	100000	TOPMed	No
chr12	8600001	8800000	0.328313	A2ML1-AS1;AC092184.3;AC092490.1;AC092490.2;AC092490.3;AICDA;HADHAP2;MFAP5;RIMKLB;RPSAP51	200000	CHN100k	No
chr12	11100001	11200000	0.357882	AC018630.2;AC134349.1;AC134349.2;AC244131.1;PRH1;SMIM10L1;TAS2R14;TAS2R30;TAS2R42	100000	TOPMed	No
chr12	123800001	123900000	0.381708	DNAH10	100000	TOPMed	No
chr13	18600001	18700000	0.385853	FAM207BP;FEM1AP4;LINC00387;LINC00388;LONRF2P2;TERF1P5	100000	ChinaMAP	No
chr13	89600001	89700000	0.378628	LINC02336	100000	TOPMed	No
chr13	112200001	112300000	0.202509	LINC01070	100000	TOPMed	Yes
chr15	22700001	22900000	0.219278	AC011767.1;AC138649.1;AC138649.3;AC138649.4;AC138649.5;CYFIP1;NIPA1;NIPA2;PDCD6IPP1	200000	SEAD	Yes
chr15	23300001	23400000	0.260744	AC100756.1;AC100756.3;AC242376.2;GOLGA8S;RN7SL536P	100000	WBBC	Yes
chr15	27900001	28300000	0.263491	HERC2;OCA2	400000	ChinaMAP	Yes
chr15	28700001	28800000	0.283125	AC055876.1;AC055876.3;AC055876.4;GOLGA8M;PDCD6IPP2;RN7SL719P;WHAMMP2	100000	ChinaMAP	Yes
chr15	28900001	29500000	0.352558	AC061965.1;AC061965.2;AC107980.1;AC127522.1;APBA2;FAM189A1;NSMCE3	600000	TOPMed	Yes
chr15	29800001	30100000	0.225594	AC022613.2;AC111152.1;AC111152.2;AC111152.3;DNM1P28;GOLGA8J;NCAPGP2;RN7SL673P;TJP1	300000	TOPMed	Yes
chr15	30600001	30700000	0.320673	AC026150.4;AC091057.1;AC091057.2;AC091057.3;AC091057.4;AC091057.6;ARHGAP11B;GOLGA8H;RN7SL628P;ULK4P2	100000	CHN100k	Yes
chr15	31000001	31100000	0.320282	AC009562.1;MIR211;TRPM1	100000	ChinaMAP	Yes
chr15	31200001	31700000	0.310665	AC012236.1;AC104759.1;KLF13;LINC02352;OTUD7A;UBE2CP4	500000	1KG	Yes
chr15	31800001	32200000	0.211175	AC068448.1;AC068448.2;AC079969.1;CHRNA7;OTUD7A	400000	TOPMed	Yes
chr15	32600001	32900000	0.280826	AC090877.1;AC090877.2;AC123768.1;AC123768.2;AC123768.3;AC123768.5;ARHGAP11A;FMN1;GOLGA8N;GREM1;RN7SL286P;SCG5	300000	ChinaMAP	Yes
chr15	44800001	45000000	0.25215	AC090888.1;AC090888.2;AC090888.3;AC122108.1;AC122108.2;RNU1-119P;RNU6-1108P;RNU6-1332P;RNU6-966P;SORD2P;TERB2	200000	1KG	No
chr16	2500001	2600000	0.365169	AC093525.1;AC093525.10;AC093525.2;AC093525.3;AC093525.4;AC093525.5;AC093525.6;AC093525.7;AC093525.8;AC093525.9;AC141586.3;AC141586.5;AMDHD2;ATP6V0C;CEMP1;MIR3178;PDPK1;TBC1D24	100000	ChinaMAP	No
chr16	14600001	14700000	0.241739	AC009167.1;BFAR;PARN;PLA2G10;RN7SL274P;RNU7-125P	100000	TOPMed	No
chr16	15000001	15100000	0.286615	AC138932.6;AC139256.2;MIR1972-1;NTAN1;PDXDC1;RRN3	100000	SEAD	Yes
chr16	15500001	15600000	0.22432	AC140504.1;BMERB1;MARF1	100000	1KG	Yes
chr16	15800001	15900000	0.181814	AC130651.1;FOPNL;MYH11;RNU6-213P	100000	ChinaMAP	Yes
chr16	16000001	16200000	0.212482	ABCC1;ABCC6;RPL17P40	200000	ChinaMAP	Yes
chr16	16700001	16900000	0.263216	AC092326.1	200000	ChinaMAP	Yes
chr16	18100001	18300000	0.332798	AC008785.1;AC010601.1;AC091489.1;AC091489.2	200000	CHN100k	Yes
chr16	18500001	18600000	0.381099	ABCC6P1;AC136618.1;AC136618.2;NOMO2	100000	ChinaMAP	Yes
chr16	31900001	32000000	0.340894	AC034105.1;AC034105.4;AC034105.5;AC142381.3;ZNF267	100000	1KG	No
chr16	33600001	34300000	0.257	AC133561.1;AC133561.2;AC133561.3;AC133561.4;AC136428.1;AC136428.2;AC136428.3;AC136428.4;AC136932.1;AC140658.1;AC140658.2;AC140658.3;AC140658.4;AC140658.5;AC140658.6;AC140658.7;AC142384.1;ARHGAP23P1;BCAP31P1;BCLAF1P2;BMS1P8;DUX4L45;DUX4L46;DUX4L47;ENPP7P13;IGHV3OR16-11;IGHV3OR16-12;IGHV3OR16-13;IGHV3OR16-16;IGHV3OR16-7;LINC00273;PCMTD1P2;RNA5-8SP2	700000	WBBC	Yes
chr16	34900001	35200000	0.371762	AC023824.1;AC023824.2;AC023824.4;AC023824.5;AC023824.6;AC135776.1;AC135776.2;AC135776.3;AC135776.4;AC135776.5;CCNYL3;CLUHP11;LINC02184;NAMPTP3;SLC25A1P4;UBE2MP1;VN1R68P;VN1R69P;VPS35P1	300000	WBBC	Yes
chr16	35300001	36100000	0.352561	AC018558.1;AC018558.2;AC018558.3;AC018558.4;AC018558.5;AC018558.6;AC018558.7;AC092325.1;AC106785.1;AC106785.2;AC116553.1;AC116553.2;AGGF1P4;AGGF1P5;AGGF1P6;AGGF1P7;AGGF1P9;C1QL1P1;C2orf69P1;C2orf69P2;C2orf69P3;C2orf69P4;FRG2DP;FRG2GP;FRG2HP;FRG2IP;HMGN2P41;KIF18BP1;LINC01566;LINC02167;PPP1R1AP2;RARRES2P10;RARRES2P7;RARRES2P8;RARRES2P9;RNA5SP406;RNA5SP407;RNA5SP408;RNA5SP409;RNA5SP410;RNA5SP411;RN…	800000	ChinaMAP	Yes
chr16	55800001	55900000	0.237105	CES1;CES5A	100000	1KG	No
chr17	1000001	1200000	0.285807	ABR;AC015884.3;AC016292.1;AC016292.2;MIR3183;TIMM22	200000	SEAD	Yes
chr17	20600001	20700000	0.396266	AC087499.1;AC087499.4;AC087499.5;AC087499.7;LINC02088	100000	TOPMed	No
chr17	45600001	45700000	0.283654	LINC02210;LINC02210-CRHR1;MAPK8IP1P2;RPS26P8	100000	TOPMed	No
chr17	46000001	46200000	0.240891	CR936218.1;KANSL1;KANSL1-AS1;MAPT	200000	TOPMed	Yes
chr17	64400001	64600000	0.399617	AC009994.1;AC234063.2;ATP5MFP4;CEP95;DDX5;MILR1;MIR3064;MIR5047;PECAM1;POLG2;SMURF2	200000	1KG	No
chr17	64800001	64900000	0.358887	AC103810.2;AC103810.5;AC103810.6;AC103810.7;AC103810.9;LRRC37A3;MIR4315-2;PLEKHM1P1;RN7SL404P;RNU7-115P	100000	ChinaMAP	No
chr17	71600001	71800000	0.328761	AC007432.1;MYL6P5	200000	1KG	No
chr18	14200001	14300000	0.303419	ANKRD20A5P;AP005212.2;AP005212.4;RHOT1P1	100000	TOPMed	No
chr18	15200001	15300000	0.3503	AP005901.4;BNIP3P3	100000	1KG	Yes
chr18	15400001	15500000	0.339558	.	100000	ChinaMAP	Yes
chr18	69900001	70200000	0.374308	CD226;RTTN	300000	TOPMed	No
chr19	20800001	20900000	0.360926	AC008739.2;ZNF66	100000	TOPMed	No
chr19	41500001	41600000	0.313058	AC243960.1;AC243960.2;AC243960.3;AC243960.7;CEACAM21;CEACAMP3;LINC01480;PCAT19;PLEKHA3P1	100000	ChinaMAP	No
chr19	43000001	43200000	0.256587	AC004784.1;AC005392.1;CEACAMP8;CEACAMP9;PSG11;PSG2;PSG4;PSG5	200000	1KG	No
chr19	54100001	54200000	0.22731	AC245052.1;AC245052.4;CNOT3;LENG1;MBOAT7;NDUFA3;OSCAR;PRPF31;TFPT;TMC4;TSEN34	100000	1KG	Yes
chr19	54500001	54600000	0.200757	AC245036.1;AC245036.2;AC245036.5;KIR3DX1;LAIR2;LILRA1;LILRA2	100000	ChinaMAP	Yes
chr20	30300001	30500000	0.352559	AC018688.1;AL121762.1;AL121762.3;FAM242A;FRG1BP;MLLT10P1	200000	1KG	Yes
chr20	61900001	62100000	0.382514	AL137077.1;AL137077.2;CDH4;MIR1257;MIR3195;TAF4	200000	CHN100k	No
chr21	13800001	14000000	0.3807	ANKRD20A11P;CNN2P7;CYP4F29P;GXYLT1P2;RHOT1P2;RNU6-954P;SNX18P13;ZNF114P1	200000	1KG	Yes
chr21	22100001	22200000	0.381692	AP000705.1;AP000705.2;LINC00308	100000	1KG	No
chr22	16300001	16500000	0.341792	ABCD1P4;AC137499.1;AC137499.2;PABPC1P9;SLC9B1P4	200000	TOPMed	Yes
chr22	22300001	22500000	0.345954	AC245060.1;AC245060.4;AC245060.7;AC245291.1;AC245291.2;AC245291.3;ASH2LP1;ASH2LP2;ASH2LP3;IGLV1-36;IGLV1-40;IGLV1-41;IGLV1-44;IGLV1-47;IGLV1-50;IGLV1-51;IGLV5-37;IGLV5-45;IGLV5-48;IGLV5-52;IGLV7-35;IGLV7-43;IGLV7-46;IGLV9-49;IGLVI-38;IGLVI-42;IGLVVII-41-1;ZNF280B	200000	SEAD	Yes
chr22	22600001	22900000	0.308152	AC244157.1;AC244157.2;AC244250.1;AC244250.2;AC244250.3;AC244250.4;AC245028.1;AC245028.2;AC245028.3;BCRP4;GGTLC2;IGLC1;IGLJ1;IGLJ2;IGLL5;IGLV2-11;IGLV2-14;IGLV2-18;IGLV2-23;IGLV2-28;IGLV2-5;IGLV2-8;IGLV3-1;IGLV3-10;IGLV3-12;IGLV3-13;IGLV3-15;IGLV3-16;IGLV3-17;IGLV3-19;IGLV3-2;IGLV3-21;IGLV3-22;IGLV3-24;IGLV3-25;IGLV3-26;IGLV3-27;IGLV3-29;IGLV3-30;IGLV3-31;IGLV3-4;IGLV3-6;IGLV3-7;IGLV3-9;IGLV4-3;IG…	300000	WBBC	Yes
chr22	23400001	23500000	0.32958	AP000344.1;FAM230I;LINC01659;ZDHHC8P1	100000	ChinaMAP	No
*Consecutive windows were merged in the table

## Sheet: Supplementary Table 13
Supplementary Table 13 Gene set enrichment for genes within poorly imputed regions
Category	ID	Name	Source	p-value	q-value Bonferroni	q-value FDR B&H	q-value FDR B&Y	Hit Count in Query List	Hit Count in Genome	Hit in Query List
GO: Molecular Function	GO:0003823	antigen binding		1.387e-22	7.336e-20	7.336e-20	5.025e-19	26	190	IGLL5,IGLV3-27,IGLV3-25,IGLV3-21,IGLV3-19,IGLV3-1,IGLV2-23,IGLV2-14,IGLV2-11,IGLV2-8,IGLV1-40,IGKV2D-28,IGKV1D-33,IGKV1D-12,IGKV3-20,IGKV3-15,IGKV2-30,IGKV1-17,IGKV1-16,IGLC1,IGKV1-5,LILRA1,LILRA2,TRBV28,TRBV12-3,TRBV7-9
GO: Molecular Function	GO:0042974	nuclear retinoic acid receptor binding		2.646e-09	1.4e-06	6.999e-07	4.794e-06	9	55	PRAMEF10,PRAMEF11,PRAMEF33,PRAMEF19,PRAMEF15,PRAMEF4,PRAMEF14,PRAMEF2,PRAMEF17
GO: Molecular Function	GO:0001791	IgM binding		3.53e-08	1.867e-05	5.553e-06	3.803e-05	5	11	LILRB2,LILRB5,LILRA1,LILRB3,LILRA2
GO: Molecular Function	GO:0030107	HLA-A specific inhibitory MHC class I receptor activity		4.199e-08	2.221e-05	5.553e-06	3.803e-05	4	5	LILRB2,LILRB5,LILRA1,LILRA2
GO: Molecular Function	GO:0032396	inhibitory MHC class I receptor activity		6.004e-08	3.176e-05	6.352e-06	4.351e-05	5	12	LILRB2,LILRB5,LILRA1,LILRB3,LILRA2
GO: Molecular Function	GO:0042277	peptide binding		8.67e-08	4.587e-05	7.364e-06	5.044e-05	16	318	LILRB2,CHRNA7,NPEPPSP1,TIMM22,APBA2,CRHR1,NPY4R,AVPR1B,LILRB5,LINC02210-CRHR1,LILRA1,LILRB3,LILRA2,TRBV28,TRBV12-3,TRBV7-9
GO: Molecular Function	GO:1990756	ubiquitin-like ligase-substrate adaptor activity		9.745e-08	5.155e-05	7.364e-06	5.044e-05	9	82	PRAMEF10,PRAMEF11,PRAMEF33,PRAMEF19,PRAMEF15,PRAMEF4,PRAMEF14,PRAMEF2,PRAMEF17
GO: Molecular Function	GO:0030109	HLA-B specific inhibitory MHC class I receptor activity		1.25e-07	6.613e-05	8.266e-06	5.661e-05	4	6	LILRB2,LILRB5,LILRA1,LILRA2
GO: Molecular Function	GO:0023025	MHC class Ib protein complex binding		2.895e-07	0.0001531	1.701e-05	0.0001165	4	7	LILRB2,LILRB5,LILRA1,LILRA2
GO: Molecular Function	GO:0140767	enzyme-substrate adaptor activity		3.507e-07	0.0001855	1.855e-05	0.0001271	9	95	PRAMEF10,PRAMEF11,PRAMEF33,PRAMEF19,PRAMEF15,PRAMEF4,PRAMEF14,PRAMEF2,PRAMEF17
GO: Molecular Function	GO:0032393	MHC class I receptor activity		6.196e-07	0.0003278	2.98e-05	0.0002041	5	18	LILRB2,LILRB5,LILRA1,LILRB3,LILRA2
GO: Molecular Function	GO:0031726	CCR1 chemokine receptor binding		3.941e-06	0.002085	0.0001738	0.00119	4	12	CCL3,CCL15,CCL18,CCL23
GO: Molecular Function	GO:0023029	MHC class Ib protein binding		1.406e-05	0.007437	0.0005721	0.003918	4	16	LILRB2,LILRB5,LILRA1,LILRA2
GO: Molecular Function	GO:0042287	MHC protein binding		2.011e-05	0.01064	0.0007597	0.005203	6	58	LILRB2,LILRB5,LILRA1,LILRA2,TRBV12-3,TRBV7-9
GO: Molecular Function	GO:0019865	immunoglobulin binding		2.367e-05	0.01252	0.0008348	0.005718	5	36	LILRB2,LILRB5,LILRA1,LILRB3,LILRA2
GO: Molecular Function	GO:0032394	MHC class Ib receptor activity		2.927e-05	0.01548	0.0009677	0.006628	4	19	LILRB2,LILRB5,LILRA1,LILRA2
GO: Molecular Function	GO:0033218	amide binding		3.604e-05	0.01906	0.001121	0.007681	12	299	CLN8,ACACA,LILRB2,CHRNA7,APBA2,CRHR1,NPY4R,LILRB5,LINC02210-CRHR1,LILRA1,LILRB3,LILRA2
GO: Molecular Function	GO:0061676	importin-alpha family protein binding		4.451e-05	0.02355	0.001308	0.00896	4	21	GOLGA8M,GOLGA8H,GOLGA8N,GOLGA8J
GO: Molecular Function	GO:0001540	amyloid-beta binding		6.016e-05	0.03183	0.001675	0.01147	7	102	LILRB2,CHRNA7,APBA2,LILRB5,LILRA1,LILRB3,LILRA2
GO: Molecular Function	GO:0016922	nuclear receptor binding		8.832e-05	0.04672	0.002336	0.016	9	187	PRAMEF10,PRAMEF11,PRAMEF33,PRAMEF19,PRAMEF15,PRAMEF4,PRAMEF14,PRAMEF2,PRAMEF17
GO: Biological Process	GO:0002250	adaptive immune response		1.411e-84	3.94e-81	3.94e-81	3.354e-80	119	838	EPHB6,LILRB2,IGLL5,IGLV5-37,IGLV4-3,IGLV3-27,IGLV3-25,IGLV3-22,IGLV3-21,IGLV3-19,IGLV3-16,IGLV3-12,IGLV3-10,IGLV3-9,IGLV3-1,IGLV2-23,IGLV2-18,IGLV2-14,IGLV2-11,IGLV2-8,IGLV1-40,IGLV1-36,IGLJ1,IGKV6D-41,IGKV6D-21,IGKV3D-20,IGKV3D-15,IGKV3D-11,IGKV2D-30,IGKV2D-29,IGKV2D-28,IGKV2D-26,IGKV2D-24,IGKV1D-42,IGKV1D-33,IGKV1D-17,IGKV1D-13,IGKV1D-12,IGKV6-21,IGKV3-20,IGKV3-15,IGKV3-7,IGKV2-30,IGKV2-29,IGKV…
GO: Biological Process	GO:0002377	immunoglobulin production		4.134e-45	1.155e-41	5.774e-42	4.915e-41	52	241	IGLV5-37,IGLV4-3,IGLV3-27,IGLV3-25,IGLV3-22,IGLV3-21,IGLV3-19,IGLV3-16,IGLV3-12,IGLV3-10,IGLV3-9,IGLV3-1,IGLV2-23,IGLV2-18,IGLV2-14,IGLV2-11,IGLV2-8,IGLV1-40,IGLV1-36,IGKV6D-41,IGKV6D-21,IGKV3D-20,IGKV3D-15,IGKV3D-11,IGKV2D-30,IGKV2D-29,IGKV2D-28,IGKV2D-26,IGKV2D-24,IGKV1D-42,IGKV1D-33,IGKV1D-17,IGKV1D-13,IGKV1D-12,IGKV6-21,IGKV3-20,IGKV3-15,IGKV3-7,IGKV2-30,IGKV2-29,IGKV2-28,IGKV2-24,IGKV1-37,IG…
GO: Biological Process	GO:0002440	production of molecular mediator of immune response		2.709e-33	7.565e-30	2.522e-30	2.146e-29	52	403	IGLV5-37,IGLV4-3,IGLV3-27,IGLV3-25,IGLV3-22,IGLV3-21,IGLV3-19,IGLV3-16,IGLV3-12,IGLV3-10,IGLV3-9,IGLV3-1,IGLV2-23,IGLV2-18,IGLV2-14,IGLV2-11,IGLV2-8,IGLV1-40,IGLV1-36,IGKV6D-41,IGKV6D-21,IGKV3D-20,IGKV3D-15,IGKV3D-11,IGKV2D-30,IGKV2D-29,IGKV2D-28,IGKV2D-26,IGKV2D-24,IGKV1D-42,IGKV1D-33,IGKV1D-17,IGKV1D-13,IGKV1D-12,IGKV6-21,IGKV3-20,IGKV3-15,IGKV3-7,IGKV2-30,IGKV2-29,IGKV2-28,IGKV2-24,IGKV1-37,IG…
GO: Biological Process	GO:0001825	blastocyst formation		2.354e-08	6.574e-05	1.644e-05	0.0001399	11	78	PRAMEF10,PRAMEF11,PRAMEF19,PRAMEF15,PRAMEF4,PRAMEF14,PRAMEF2,CNOT3,HNF1B,PRAMEF17,TJP1
GO: Biological Process	GO:1900454	positive regulation of long-term synaptic depression		1.33e-06	0.003715	0.000743	0.006325	5	14	MAPT,LILRB2,LILRB5,LILRA1,LILRA2
GO: Cellular Component	GO:0042101	T cell receptor complex		2.333e-61	9.566e-59	9.566e-59	6.308e-58	56	163	TRBV30,TRBV29-1,TRBV28,TRBV27,TRBV16,TRBV14,TRBV13,TRBV12-5,TRBV12-4,TRBV12-3,TRBV11-3,TRBV11-2,TRBV11-1,TRBV10-3,TRBV10-2,TRBV10-1,TRBV9,TRBV7-9,TRBV7-7,TRBV7-6,TRBV7-4,TRBV7-3,TRBV7-2,TRBV7-1,TRBV6-8,TRBV6-7,TRBV6-6,TRBV6-5,TRBV6-4,TRBV6-1,TRBV5-7,TRBV5-6,TRBV5-5,TRBV5-4,TRBV5-3,TRBV5-1,TRBV4-2,TRBV4-1,TRBV3-1,TRBV2,TRBJ2-7,TRBJ2-6,TRBJ2-5,TRBJ2-4,TRBJ2-3,TRBJ2-2,TRBJ2-1,TRBJ1-6,TRBJ1-5,TRBJ1-4…
GO: Cellular Component	GO:0019814	immunoglobulin complex		3.127e-59	1.282e-56	6.41e-57	4.227e-56	55	166	IGLL5,IGLV5-37,IGLV4-3,IGLV3-27,IGLV3-25,IGLV3-22,IGLV3-21,IGLV3-19,IGLV3-16,IGLV3-12,IGLV3-10,IGLV3-9,IGLV3-1,IGLV2-23,IGLV2-18,IGLV2-14,IGLV2-11,IGLV2-8,IGLV1-40,IGLV1-36,IGLJ1,IGKV6D-41,IGKV6D-21,IGKV3D-20,IGKV3D-15,IGKV3D-11,IGKV2D-30,IGKV2D-29,IGKV2D-28,IGKV2D-26,IGKV2D-24,IGKV1D-42,IGKV1D-33,IGKV1D-17,IGKV1D-13,IGKV1D-12,IGKV6-21,IGKV3-20,IGKV3-15,IGKV3-7,IGKV2-30,IGKV2-29,IGKV2-28,IGKV2-24…
GO: Cellular Component	GO:0098802	plasma membrane signaling receptor complex		2.616e-42	1.073e-39	3.575e-40	2.358e-39	57	350	CHRNA7,TRBV30,TRBV29-1,TRBV28,TRBV27,TRBV16,TRBV14,TRBV13,TRBV12-5,TRBV12-4,TRBV12-3,TRBV11-3,TRBV11-2,TRBV11-1,TRBV10-3,TRBV10-2,TRBV10-1,TRBV9,TRBV7-9,TRBV7-7,TRBV7-6,TRBV7-4,TRBV7-3,TRBV7-2,TRBV7-1,TRBV6-8,TRBV6-7,TRBV6-6,TRBV6-5,TRBV6-4,TRBV6-1,TRBV5-7,TRBV5-6,TRBV5-5,TRBV5-4,TRBV5-3,TRBV5-1,TRBV4-2,TRBV4-1,TRBV3-1,TRBV2,TRBJ2-7,TRBJ2-6,TRBJ2-5,TRBJ2-4,TRBJ2-3,TRBJ2-2,TRBJ2-1,TRBJ1-6,TRBJ1-5,…
GO: Cellular Component	GO:0043235	receptor complex		3.86e-30	1.583e-27	3.957e-28	2.609e-27	57	581	CHRNA7,TRBV30,TRBV29-1,TRBV28,TRBV27,TRBV16,TRBV14,TRBV13,TRBV12-5,TRBV12-4,TRBV12-3,TRBV11-3,TRBV11-2,TRBV11-1,TRBV10-3,TRBV10-2,TRBV10-1,TRBV9,TRBV7-9,TRBV7-7,TRBV7-6,TRBV7-4,TRBV7-3,TRBV7-2,TRBV7-1,TRBV6-8,TRBV6-7,TRBV6-6,TRBV6-5,TRBV6-4,TRBV6-1,TRBV5-7,TRBV5-6,TRBV5-5,TRBV5-4,TRBV5-3,TRBV5-1,TRBV4-2,TRBV4-1,TRBV3-1,TRBV2,TRBJ2-7,TRBJ2-6,TRBJ2-5,TRBJ2-4,TRBJ2-3,TRBJ2-2,TRBJ2-1,TRBJ1-6,TRBJ1-5,…
GO: Cellular Component	GO:0098797	plasma membrane protein complex		3.231e-29	1.325e-26	2.649e-27	1.747e-26	64	785	LILRB2,CHRNA7,CNTNAP2,LILRB5,LILRA1,LILRB3,LILRA2,TRBV30,TRBV29-1,TRBV28,TRBV27,TRBV16,TRBV14,TRBV13,TRBV12-5,TRBV12-4,TRBV12-3,APH1A,TRBV11-3,TRBV11-2,TRBV11-1,TRBV10-3,TRBV10-2,TRBV10-1,TRBV9,TRBV7-9,TRBV7-7,TRBV7-6,TRBV7-4,TRBV7-3,TRBV7-2,TRBV7-1,TRBV6-8,TRBV6-7,TRBV6-6,TRBV6-5,TRBV6-4,TRBV6-1,TRBV5-7,TRBV5-6,TRBV5-5,TRBV5-4,TRBV5-3,TRBV5-1,TRBV4-2,TRBV4-1,TRBV3-1,TRBV2,TRBJ2-7,TRBJ2-6,TRBJ2-5…
GO: Cellular Component	GO:0098796	membrane protein complex		3.763e-19	1.543e-16	2.571e-17	1.696e-16	72	1498	SYNRG,LILRB2,CHRNA7,SOCS7,PKD1,TRPV6,TIMM22,CNTNAP2,NDUFA3,ARL6IP1,LILRB5,LILRA1,LILRB3,LILRA2,TRBV30,TRBV29-1,TRBV28,TRBV27,TRBV16,TRBV14,TRBV13,TRBV12-5,TRBV12-4,TRBV12-3,APH1A,TRBV11-3,TRBV11-2,TRBV11-1,TRBV10-3,TRBV10-2,TRBV10-1,TRBV9,TRBV7-9,TRBV7-7,TRBV7-6,TRBV7-4,TRBV7-3,TRBV7-2,TRBV7-1,TRBV6-8,TRBV6-7,TRBV6-6,TRBV6-5,TRBV6-4,TRBV6-1,TRBV5-7,TRBV5-6,TRBV5-5,TRBV5-4,TRBV5-3,TRBV5-1,TRBV4-2,…
GO: Cellular Component	GO:0031462	Cul2-RING ubiquitin ligase complex		2.789e-08	1.143e-05	1.633e-06	1.077e-05	9	47	PRAMEF10,PRAMEF11,PRAMEF33,PRAMEF19,PRAMEF15,PRAMEF4,PRAMEF14,PRAMEF2,PRAMEF17
GO: Cellular Component	GO:0071754	IgM immunoglobulin complex, circulating		3.935e-08	1.613e-05	1.789e-06	1.18e-05	5	8	IGKV3D-20,IGKV3D-15,IGKV3D-11,IGKV3-20,IGKV3-15
GO: Cellular Component	GO:0071756	pentameric IgM immunoglobulin complex		3.935e-08	1.613e-05	1.789e-06	1.18e-05	5	8	IGKV3D-20,IGKV3D-15,IGKV3D-11,IGKV3-20,IGKV3-15
GO: Cellular Component	GO:0071745	IgA immunoglobulin complex		4.799e-08	1.968e-05	1.789e-06	1.18e-05	6	15	IGKV3D-20,IGKV3D-15,IGKV3D-11,IGKV3-20,IGKV3-15,IGLC1
GO: Cellular Component	GO:0071753	IgM immunoglobulin complex		4.799e-08	1.968e-05	1.789e-06	1.18e-05	6	15	IGKV3D-20,IGKV3D-15,IGKV3D-11,IGKV3-20,IGKV3-15,IGLC1
GO: Cellular Component	GO:0032998	Fc-epsilon receptor I complex		8.745e-08	3.585e-05	2.758e-06	1.819e-05	5	9	LILRB2,LILRB5,LILRA1,LILRB3,LILRA2
GO: Cellular Component	GO:0071748	monomeric IgA immunoglobulin complex		8.745e-08	3.585e-05	2.758e-06	1.819e-05	5	9	IGKV3D-20,IGKV3D-15,IGKV3D-11,IGKV3-20,IGKV3-15
GO: Cellular Component	GO:0071749	polymeric IgA immunoglobulin complex		1.728e-07	7.083e-05	4.427e-06	2.919e-05	5	10	IGKV3D-20,IGKV3D-15,IGKV3D-11,IGKV3-20,IGKV3-15
GO: Cellular Component	GO:0071746	IgA immunoglobulin complex, circulating		1.728e-07	7.083e-05	4.427e-06	2.919e-05	5	10	IGKV3D-20,IGKV3D-15,IGKV3D-11,IGKV3-20,IGKV3-15
GO: Cellular Component	GO:0071751	secretory IgA immunoglobulin complex		1.728e-07	7.083e-05	4.427e-06	2.919e-05	5	10	IGKV3D-20,IGKV3D-15,IGKV3D-11,IGKV3-20,IGKV3-15
GO: Cellular Component	GO:0032997	Fc receptor complex		5.297e-07	0.0002172	1.278e-05	8.425e-05	5	12	LILRB2,LILRB5,LILRA1,LILRB3,LILRA2
GO: Cellular Component	GO:0072562	blood microparticle		1.83e-06	0.0007504	4.169e-05	0.0002749	12	144	IGLV3-25,IGLV3-21,IGKV2D-28,IGKV1D-33,IGKV1D-12,IGKV3-20,IGKV3-15,IGKV2-30,IGKV1-17,IGLC1,PRSS1,IGKV1-5
GO: Cellular Component	GO:0042571	immunoglobulin complex, circulating		3.891e-06	0.001595	8.397e-05	0.0005538	5	17	IGKV3D-20,IGKV3D-15,IGKV3D-11,IGKV3-20,IGKV3-15
GO: Cellular Component	GO:0000137	Golgi cis cisterna		8.462e-06	0.00347	0.0001735	0.001144	6	33	GOLGA8IP,GOLGA8M,GOLGA8H,GOLGA8N,GOLGA8S,GOLGA8J
GO: Cellular Component	GO:0001669	acrosomal vesicle		6.82e-05	0.02796	0.001331	0.008781	12	206	PRAMEF10,PRAMEF11,PRAMEF19,PRAMEF15,PRAMEF4,SPACA7,ADAM2,PRSS2,PRAMEF2,SPATA31A3,PRAMEF17,SPATA31A1
Pathway	M27581	REACTOME_CD22_MEDIATED_BCR_REGULATION	Reactome Pathways	2.832e-35	2.447e-32	2.447e-32	1.796e-31	26	61	IGLV3-27,IGLV3-25,IGLV3-21,IGLV3-19,IGLV3-1,IGLV2-23,IGLV2-14,IGLV2-11,IGLV2-8,IGLV1-40,IGKV3D-20,IGKV2D-30,IGKV2D-28,IGKV1D-33,IGKV1D-16,IGKV1D-12,IGKV3-20,IGKV3-15,IGKV3-11,IGKV2-30,IGKV2-28,IGKV1-33,IGKV1-17,IGKV1-16,IGKV1-12,IGKV1-5
Pathway	M8240	REACTOME_IMMUNOREGULATORY_INTERACTIONS_BETWEEN_A_LYMPHOID_AND_A_NON_LYMPHOID_CELL	Reactome Pathways	3.11e-34	2.687e-31	1.343e-31	9.86e-31	36	190	LILRB2,OSCAR,IGLV3-27,IGLV3-25,IGLV3-21,IGLV3-19,IGLV3-1,IGLV2-23,IGLV2-14,IGLV2-11,IGLV2-8,IGLV1-40,IGKV3D-20,IGKV2D-30,IGKV2D-28,IGKV1D-33,IGKV1D-16,IGKV1D-12,IGKV3-20,IGKV3-15,IGKV3-11,IGKV2-30,IGKV2-28,IGKV1-33,IGKV1-17,IGKV1-16,IGKV1-12,LILRA6,IGKV1-5,LILRB5,LILRA1,LILRB3,LILRA2,LAIR2,TRBV12-3,TRBV7-9
Pathway	M27108	REACTOME_FCGR_ACTIVATION	Reactome Pathways	1.517e-33	1.311e-30	3.277e-31	2.405e-30	26	69	IGLV3-27,IGLV3-25,IGLV3-21,IGLV3-19,IGLV3-1,IGLV2-23,IGLV2-14,IGLV2-11,IGLV2-8,IGLV1-40,IGKV3D-20,IGKV2D-30,IGKV2D-28,IGKV1D-33,IGKV1D-16,IGKV1D-12,IGKV3-20,IGKV3-15,IGKV3-11,IGKV2-30,IGKV2-28,IGKV1-33,IGKV1-17,IGKV1-16,IGKV1-12,IGKV1-5
Pathway	M27150	REACTOME_SCAVENGING_OF_HEME_FROM_PLASMA	Reactome Pathways	1.517e-33	1.311e-30	3.277e-31	2.405e-30	26	69	IGLV3-27,IGLV3-25,IGLV3-21,IGLV3-19,IGLV3-1,IGLV2-23,IGLV2-14,IGLV2-11,IGLV2-8,IGLV1-40,IGKV3D-20,IGKV2D-30,IGKV2D-28,IGKV1D-33,IGKV1D-16,IGKV1D-12,IGKV3-20,IGKV3-15,IGKV3-11,IGKV2-30,IGKV2-28,IGKV1-33,IGKV1-17,IGKV1-16,IGKV1-12,IGKV1-5
Pathway	M1078	REACTOME_CREATION_OF_C4_AND_C2_ACTIVATORS	Reactome Pathways	3.738e-33	3.23e-30	5.383e-31	3.951e-30	26	71	IGLV3-27,IGLV3-25,IGLV3-21,IGLV3-19,IGLV3-1,IGLV2-23,IGLV2-14,IGLV2-11,IGLV2-8,IGLV1-40,IGKV3D-20,IGKV2D-30,IGKV2D-28,IGKV1D-33,IGKV1D-16,IGKV1D-12,IGKV3-20,IGKV3-15,IGKV3-11,IGKV2-30,IGKV2-28,IGKV1-33,IGKV1-17,IGKV1-16,IGKV1-12,IGKV1-5
Pathway	M27203	REACTOME_ROLE_OF_LAT2_NTAL_LAB_ON_CALCIUM_MOBILIZATION	Reactome Pathways	3.738e-33	3.23e-30	5.383e-31	3.951e-30	26	71	IGLV3-27,IGLV3-25,IGLV3-21,IGLV3-19,IGLV3-1,IGLV2-23,IGLV2-14,IGLV2-11,IGLV2-8,IGLV1-40,IGKV3D-20,IGKV2D-30,IGKV2D-28,IGKV1D-33,IGKV1D-16,IGKV1D-12,IGKV3-20,IGKV3-15,IGKV3-11,IGKV2-30,IGKV2-28,IGKV1-33,IGKV1-17,IGKV1-16,IGKV1-12,IGKV1-5
Pathway	M6121	REACTOME_INITIAL_TRIGGERING_OF_COMPLEMENT	Reactome Pathways	1.5e-31	1.296e-28	1.851e-29	1.359e-28	26	80	IGLV3-27,IGLV3-25,IGLV3-21,IGLV3-19,IGLV3-1,IGLV2-23,IGLV2-14,IGLV2-11,IGLV2-8,IGLV1-40,IGKV3D-20,IGKV2D-30,IGKV2D-28,IGKV1D-33,IGKV1D-16,IGKV1D-12,IGKV3-20,IGKV3-15,IGKV3-11,IGKV2-30,IGKV2-28,IGKV1-33,IGKV1-17,IGKV1-16,IGKV1-12,IGKV1-5
Pathway	M27110	REACTOME_ROLE_OF_PHOSPHOLIPIDS_IN_PHAGOCYTOSIS	Reactome Pathways	3.176e-31	2.744e-28	3.43e-29	2.517e-28	26	82	IGLV3-27,IGLV3-25,IGLV3-21,IGLV3-19,IGLV3-1,IGLV2-23,IGLV2-14,IGLV2-11,IGLV2-8,IGLV1-40,IGKV3D-20,IGKV2D-30,IGKV2D-28,IGKV1D-33,IGKV1D-16,IGKV1D-12,IGKV3-20,IGKV3-15,IGKV3-11,IGKV2-30,IGKV2-28,IGKV1-33,IGKV1-17,IGKV1-16,IGKV1-12,IGKV1-5
Pathway	M601	REACTOME_ANTIGEN_ACTIVATES_B_CELL_RECEPTOR_BCR_LEADING_TO_GENERATION_OF_SECOND_MESSENGERS	Reactome Pathways	1.333e-30	1.151e-27	1.151e-28	8.451e-28	26	86	IGLV3-27,IGLV3-25,IGLV3-21,IGLV3-19,IGLV3-1,IGLV2-23,IGLV2-14,IGLV2-11,IGLV2-8,IGLV1-40,IGKV3D-20,IGKV2D-30,IGKV2D-28,IGKV1D-33,IGKV1D-16,IGKV1D-12,IGKV3-20,IGKV3-15,IGKV3-11,IGKV2-30,IGKV2-28,IGKV1-33,IGKV1-17,IGKV1-16,IGKV1-12,IGKV1-5
Pathway	M27206	REACTOME_FCERI_MEDIATED_CA_2_MOBILIZATION	Reactome Pathways	1.333e-30	1.151e-27	1.151e-28	8.451e-28	26	86	IGLV3-27,IGLV3-25,IGLV3-21,IGLV3-19,IGLV3-1,IGLV2-23,IGLV2-14,IGLV2-11,IGLV2-8,IGLV1-40,IGKV3D-20,IGKV2D-30,IGKV2D-28,IGKV1D-33,IGKV1D-16,IGKV1D-12,IGKV3-20,IGKV3-15,IGKV3-11,IGKV2-30,IGKV2-28,IGKV1-33,IGKV1-17,IGKV1-16,IGKV1-12,IGKV1-5
Pathway	M27205	REACTOME_FCERI_MEDIATED_MAPK_ACTIVATION	Reactome Pathways	1.883e-30	1.627e-27	1.479e-28	1.086e-27	26	87	IGLV3-27,IGLV3-25,IGLV3-21,IGLV3-19,IGLV3-1,IGLV2-23,IGLV2-14,IGLV2-11,IGLV2-8,IGLV1-40,IGKV3D-20,IGKV2D-30,IGKV2D-28,IGKV1D-33,IGKV1D-16,IGKV1D-12,IGKV3-20,IGKV3-15,IGKV3-11,IGKV2-30,IGKV2-28,IGKV1-33,IGKV1-17,IGKV1-16,IGKV1-12,IGKV1-5
Pathway	M29842	REACTOME_FCGR3A_MEDIATED_IL10_SYNTHESIS	Reactome Pathways	2.543e-29	2.197e-26	1.831e-27	1.344e-26	26	95	IGLV3-27,IGLV3-25,IGLV3-21,IGLV3-19,IGLV3-1,IGLV2-23,IGLV2-14,IGLV2-11,IGLV2-8,IGLV1-40,IGKV3D-20,IGKV2D-30,IGKV2D-28,IGKV1D-33,IGKV1D-16,IGKV1D-12,IGKV3-20,IGKV3-15,IGKV3-11,IGKV2-30,IGKV2-28,IGKV1-33,IGKV1-17,IGKV1-16,IGKV1-12,IGKV1-5
Pathway	M27152	REACTOME_BINDING_AND_UPTAKE_OF_LIGANDS_BY_SCAVENGER_RECEPTORS	Reactome Pathways	6.307e-29	5.449e-26	4.191e-27	3.076e-26	26	98	IGLV3-27,IGLV3-25,IGLV3-21,IGLV3-19,IGLV3-1,IGLV2-23,IGLV2-14,IGLV2-11,IGLV2-8,IGLV1-40,IGKV3D-20,IGKV2D-30,IGKV2D-28,IGKV1D-33,IGKV1D-16,IGKV1D-12,IGKV3-20,IGKV3-15,IGKV3-11,IGKV2-30,IGKV2-28,IGKV1-33,IGKV1-17,IGKV1-16,IGKV1-12,IGKV1-5
Pathway	M29843	REACTOME_PARASITE_INFECTION	Reactome Pathways	2.55e-28	2.203e-25	1.574e-26	1.155e-25	27	116	IGLV3-27,IGLV3-25,IGLV3-21,IGLV3-19,IGLV3-1,IGLV2-23,IGLV2-14,IGLV2-11,IGLV2-8,IGLV1-40,IGKV3D-20,IGKV2D-30,IGKV2D-28,IGKV1D-33,IGKV1D-16,IGKV1D-12,IGKV3-20,IGKV3-15,IGKV3-11,IGKV2-30,IGKV2-28,IGKV1-33,IGKV1-17,IGKV1-16,IGKV1-12,IGKV1-5,CYFIP1
Pathway	M19752	REACTOME_COMPLEMENT_CASCADE	Reactome Pathways	6.202e-27	5.359e-24	3.572e-25	2.622e-24	26	115	IGLV3-27,IGLV3-25,IGLV3-21,IGLV3-19,IGLV3-1,IGLV2-23,IGLV2-14,IGLV2-11,IGLV2-8,IGLV1-40,IGKV3D-20,IGKV2D-30,IGKV2D-28,IGKV1D-33,IGKV1D-16,IGKV1D-12,IGKV3-20,IGKV3-15,IGKV3-11,IGKV2-30,IGKV2-28,IGKV1-33,IGKV1-17,IGKV1-16,IGKV1-12,IGKV1-5
Pathway	M27107	REACTOME_FCGAMMA_RECEPTOR_FCGR_DEPENDENT_PHAGOCYTOSIS	Reactome Pathways	1.099e-25	9.496e-23	5.935e-24	4.356e-23	27	143	IGLV3-27,IGLV3-25,IGLV3-21,IGLV3-19,IGLV3-1,IGLV2-23,IGLV2-14,IGLV2-11,IGLV2-8,IGLV1-40,IGKV3D-20,IGKV2D-30,IGKV2D-28,IGKV1D-33,IGKV1D-16,IGKV1D-12,IGKV3-20,IGKV3-15,IGKV3-11,IGKV2-30,IGKV2-28,IGKV1-33,IGKV1-17,IGKV1-16,IGKV1-12,IGKV1-5,CYFIP1
Pathway	M29840	REACTOME_ANTI_INFLAMMATORY_RESPONSE_FAVOURING_LEISHMANIA_PARASITE_INFECTION	Reactome Pathways	4.416e-25	3.816e-22	2.245e-23	1.647e-22	26	134	IGLV3-27,IGLV3-25,IGLV3-21,IGLV3-19,IGLV3-1,IGLV2-23,IGLV2-14,IGLV2-11,IGLV2-8,IGLV1-40,IGKV3D-20,IGKV2D-30,IGKV2D-28,IGKV1D-33,IGKV1D-16,IGKV1D-12,IGKV3-20,IGKV3-15,IGKV3-11,IGKV2-30,IGKV2-28,IGKV1-33,IGKV1-17,IGKV1-16,IGKV1-12,IGKV1-5
Pathway	M27207	REACTOME_FCERI_MEDIATED_NF_KB_ACTIVATION	Reactome Pathways	6.638e-25	5.736e-22	3.186e-23	2.339e-22	26	136	IGLV3-27,IGLV3-25,IGLV3-21,IGLV3-19,IGLV3-1,IGLV2-23,IGLV2-14,IGLV2-11,IGLV2-8,IGLV1-40,IGKV3D-20,IGKV2D-30,IGKV2D-28,IGKV1D-33,IGKV1D-16,IGKV1D-12,IGKV3-20,IGKV3-15,IGKV3-11,IGKV2-30,IGKV2-28,IGKV1-33,IGKV1-17,IGKV1-16,IGKV1-12,IGKV1-5
Pathway	M39007	REACTOME_POTENTIAL_THERAPEUTICS_FOR_SARS	Reactome Pathways	1.954e-23	1.688e-20	8.885e-22	6.521e-21	26	154	IGLV3-27,IGLV3-25,IGLV3-21,IGLV3-19,IGLV3-1,IGLV2-23,IGLV2-14,IGLV2-11,IGLV2-8,IGLV1-40,IGKV3D-20,IGKV2D-30,IGKV2D-28,IGKV1D-33,IGKV1D-16,IGKV1D-12,IGKV3-20,IGKV3-15,IGKV3-11,IGKV2-30,IGKV2-28,IGKV1-33,IGKV1-17,IGKV1-16,IGKV1-12,IGKV1-5
Pathway	M608	REACTOME_SIGNALING_BY_THE_B_CELL_RECEPTOR_BCR	Reactome Pathways	1.459e-22	1.261e-19	6.303e-21	4.626e-20	26	166	IGLV3-27,IGLV3-25,IGLV3-21,IGLV3-19,IGLV3-1,IGLV2-23,IGLV2-14,IGLV2-11,IGLV2-8,IGLV1-40,IGKV3D-20,IGKV2D-30,IGKV2D-28,IGKV1D-33,IGKV1D-16,IGKV1D-12,IGKV3-20,IGKV3-15,IGKV3-11,IGKV2-30,IGKV2-28,IGKV1-33,IGKV1-17,IGKV1-16,IGKV1-12,IGKV1-5
Pathway	M16312	REACTOME_CELL_SURFACE_INTERACTIONS_AT_THE_VASCULAR_WALL	Reactome Pathways	5.341e-22	4.615e-19	2.198e-20	1.613e-19	27	194	GP6,IGLV3-27,IGLV3-25,IGLV3-21,IGLV3-19,IGLV3-1,IGLV2-23,IGLV2-14,IGLV2-11,IGLV2-8,IGLV1-40,IGKV3D-20,IGKV2D-30,IGKV2D-28,IGKV1D-33,IGKV1D-16,IGKV1D-12,IGKV3-20,IGKV3-15,IGKV3-11,IGKV2-30,IGKV2-28,IGKV1-33,IGKV1-17,IGKV1-16,IGKV1-12,IGKV1-5
Pathway	M27175	REACTOME_FC_EPSILON_RECEPTOR_FCERI_SIGNALING	Reactome Pathways	2.946e-21	2.546e-18	1.157e-19	8.492e-19	26	186	IGLV3-27,IGLV3-25,IGLV3-21,IGLV3-19,IGLV3-1,IGLV2-23,IGLV2-14,IGLV2-11,IGLV2-8,IGLV1-40,IGKV3D-20,IGKV2D-30,IGKV2D-28,IGKV1D-33,IGKV1D-16,IGKV1D-12,IGKV3-20,IGKV3-15,IGKV3-11,IGKV2-30,IGKV2-28,IGKV1-33,IGKV1-17,IGKV1-16,IGKV1-12,IGKV1-5
Pathway	M29836	REACTOME_LEISHMANIA_INFECTION	Reactome Pathways	1.402e-20	1.211e-17	5.267e-19	3.866e-18	27	219	IGLV3-27,IGLV3-25,IGLV3-21,IGLV3-19,IGLV3-1,IGLV2-23,IGLV2-14,IGLV2-11,IGLV2-8,IGLV1-40,IGKV3D-20,IGKV2D-30,IGKV2D-28,IGKV1D-33,IGKV1D-16,IGKV1D-12,IGKV3-20,IGKV3-15,IGKV3-11,IGKV2-30,IGKV2-28,IGKV1-33,IGKV1-17,IGKV1-16,IGKV1-12,IGKV1-5,CYFIP1
Pathway	M46448	WP_17Q12_COPY_NUMBER_VARIATION_SYNDROME	WikiPathways	4.221e-17	3.647e-14	1.52e-15	1.115e-14	18	99	SYNRG,ACACA,MRM1,GPR179,SOCS7,CCL3,CCL15,CCL18,ARHGAP23,DHRS11,MRPL45,TADA2A,HNF1B,DDX52,DUSP14,SRCIN1,LHX1,AATF
Pathway	M39009	REACTOME_SARS_COV_INFECTIONS	Reactome Pathways	1.039e-14	8.973e-12	3.589e-13	2.634e-12	30	471	VPS45,RPS9,RPS15A,IGLV3-27,IGLV3-25,IGLV3-21,IGLV3-19,IGLV3-1,IGLV2-23,IGLV2-14,IGLV2-11,IGLV2-8,IGLV1-40,IGKV3D-20,IGKV2D-30,IGKV2D-28,IGKV1D-33,IGKV1D-16,IGKV1D-12,IGKV3-20,IGKV3-15,IGKV3-11,IGKV2-30,IGKV2-28,IGKV1-33,IGKV1-17,IGKV1-16,IGKV1-12,IGKV1-5,TJP1
Pathway	M1058	REACTOME_ADAPTIVE_IMMUNE_SYSTEM	Reactome Pathways	1.284e-14	1.109e-11	4.266e-13	3.131e-12	39	828	LILRB2,OSCAR,IGLV3-27,IGLV3-25,IGLV3-21,IGLV3-19,IGLV3-1,IGLV2-23,IGLV2-14,IGLV2-11,IGLV2-8,IGLV1-40,IGKV3D-20,IGKV2D-30,IGKV2D-28,IGKV1D-33,IGKV1D-16,IGKV1D-12,IGKV3-20,IGKV3-15,IGKV3-11,IGKV2-30,IGKV2-28,IGKV1-33,TRAF7,IGKV1-17,IGKV1-16,IGKV1-12,LILRA6,CTSE,IGKV1-5,HERC2,LILRB5,LILRA1,LILRB3,LILRA2,LAIR2,TRBV12-3,TRBV7-9
Pathway	M39883	WP_15Q133_COPY_NUMBER_VARIATION_SYNDROME	WikiPathways	1.778e-12	1.536e-09	5.69e-11	4.176e-10	9	23	CHRNA7,TRPM1,FAN1,KLF13,GOLGA8H,MIR211,ULK4P2,ARHGAP11B,OTUD7A
Pathway	M48104	WP_15Q11Q13_COPY_NUMBER_VARIATION	WikiPathways	4.987e-11	4.309e-08	1.539e-09	1.129e-08	11	59	CHRNA7,TRPM1,APBA2,FAN1,KLF13,GOLGA8H,MIR211,GOLGA8J,NSMCE3,TJP1,OTUD7A
Pathway	M8395	REACTOME_HEMOSTASIS	Reactome Pathways	5.579e-10	4.82e-07	1.646e-08	1.208e-07	29	679	GP6,VPS45,IGLV3-27,IGLV3-25,IGLV3-21,IGLV3-19,IGLV3-1,IGLV2-23,IGLV2-14,IGLV2-11,IGLV2-8,IGLV1-40,IGKV3D-20,IGKV2D-30,IGKV2D-28,IGKV1D-33,IGKV1D-16,IGKV1D-12,IGKV3-20,IGKV3-15,IGKV3-11,IGKV2-30,IGKV2-28,IGKV1-33,IGKV1-17,IGKV1-16,IGKV1-12,IGKV1-5,KIF26B
Pathway	M27507	REACTOME_VESICLE_MEDIATED_TRANSPORT	Reactome Pathways	5.716e-10	4.939e-07	1.646e-08	1.208e-07	30	725	VPS45,IGLV3-27,IGLV3-25,IGLV3-21,IGLV3-19,IGLV3-1,IGLV2-23,IGLV2-14,IGLV2-11,IGLV2-8,IGLV1-40,IGKV3D-20,IGKV2D-30,IGKV2D-28,IGKV1D-33,IGKV1D-16,IGKV1D-12,IGKV3-20,IGKV3-15,IGKV3-11,IGKV2-30,IGKV2-28,IGKV1-33,IGKV1-17,IGKV1-16,IGKV1-12,RAB7B,IGKV1-5,KIF26B,TJP1
Pathway	M48034	REACTOME_VIRAL_INFECTION_PATHWAYS	Reactome Pathways	6.072e-08	5.246e-05	1.692e-06	1.242e-05	30	888	VPS45,RPS9,RPS15A,IGLV3-27,IGLV3-25,IGLV3-21,IGLV3-19,IGLV3-1,IGLV2-23,IGLV2-14,IGLV2-11,IGLV2-8,IGLV1-40,IGKV3D-20,IGKV2D-30,IGKV2D-28,IGKV1D-33,IGKV1D-16,IGKV1D-12,IGKV3-20,IGKV3-15,IGKV3-11,IGKV2-30,IGKV2-28,IGKV1-33,IGKV1-17,IGKV1-16,IGKV1-12,IGKV1-5,TJP1
Pathway	M27548	REACTOME_INFECTIOUS_DISEASE	Reactome Pathways	1.304e-06	0.001126	3.52e-05	0.0002583	31	1081	VPS45,RPS9,RPS15A,IGLV3-27,IGLV3-25,IGLV3-21,IGLV3-19,IGLV3-1,IGLV2-23,IGLV2-14,IGLV2-11,IGLV2-8,IGLV1-40,IGKV3D-20,IGKV2D-30,IGKV2D-28,IGKV1D-33,IGKV1D-16,IGKV1D-12,IGKV3-20,IGKV3-15,IGKV3-11,IGKV2-30,IGKV2-28,IGKV1-33,IGKV1-17,IGKV1-16,IGKV1-12,IGKV1-5,CYFIP1,TJP1
Pathway	M39879	WP_15Q112_COPY_NUMBER_VARIATION_SYNDROME	WikiPathways	1.927e-06	0.001665	5.045e-05	0.0003702	4	9	TUBGCP5,CYFIP1,NIPA2,NIPA1
Pathway	M1036	REACTOME_INNATE_IMMUNE_SYSTEM	Reactome Pathways	3.179e-06	0.002747	8.079e-05	0.000593	31	1128	LILRB2,OSCAR,IGLV3-27,IGLV3-25,IGLV3-21,IGLV3-19,IGLV3-1,IGLV2-23,IGLV2-14,IGLV2-11,IGLV2-8,IGLV1-40,IGKV3D-20,IGKV2D-30,IGKV2D-28,IGKV1D-33,IGKV1D-16,IGKV1D-12,IGKV3-20,IGKV3-15,IGKV3-11,IGKV2-30,IGKV2-28,IGKV1-33,IGKV1-17,IGKV1-16,IGKV1-12,PRSS2,IGKV1-5,CYFIP1,LILRB3
Pathway	MM14781	REACTOME_IMMUNOREGULATORY_INTERACTIONS_BETWEEN_A_LYMPHOID_AND_A_NON_LYMPHOID_CELL	Reactome Pathways	2.304e-05	0.0199	0.0005687	0.004174	9	135	OSCAR,IGLL5,IGLV2-14,IGKV2D-28,IGKV1D-33,IGKV2-28,LAIR2,TRBV12-4,TRBV12-3
Pathway	M39542	WP_PRADERWILLI_AND_ANGELMAN_SYNDROME	WikiPathways	3.326e-05	0.02874	0.0007983	0.005859	8	109	TUBGCP5,SNORD109A,CYFIP1,NIPA2,NIPA1,HERC2,GOLGA8S,OCA2
Pathway	MM17219	REACTOME_CD22_MEDIATED_BCR_REGULATION	Reactome Pathways	4.362e-05	0.03769	0.001019	0.007475	5	35	IGLL5,IGLV2-14,IGKV2D-28,IGKV1D-33,IGKV2-28
Pubmed	8650574	The complete 685-kilobase DNA sequence of the human beta T cell receptor locus.	Pubmed	1.002e-118	1.708e-114	1.708e-114	1.763e-113	73	95	MOXD2P,PRSS3P3,PRSS58,PRSS3P1,PRSS1,PRSS2,TRBVB,TRBV30,TRBV29-1,TRBV28,TRBV27,TRBV16,TRBV15,TRBV14,TRBV13,TRBV12-5,TRBV12-4,TRBV12-3,TRBV12-2,TRBV12-1,TRBV11-3,TRBV11-2,TRBV11-1,TRBV10-3,TRBV10-2,TRBV10-1,TRBV9,TRBV8-2,TRBV8-1,TRBV7-9,TRBV7-7,TRBV7-6,TRBV7-5,TRBV7-4,TRBV7-3,TRBV7-2,TRBV7-1,TRBV6-8,TRBV6-7,TRBV6-6,TRBV6-5,TRBV6-4,TRBV6-2,TRBV6-1,TRBV5-7,TRBV5-6,TRBV5-5,TRBV5-4,TRBV5-3,TRBV5-2,TRBV…
Pubmed	9074928	One-megabase sequence analysis of the human immunoglobulin lambda gene locus.	Pubmed	1.99e-62	3.392e-58	1.696e-58	1.751e-57	49	109	GGTLC2,IGLVI-38,IGLVI-20,IGLV7-35,IGLV5-37,IGLV4-3,IGLV3-31,IGLV3-30,IGLV3-29,IGLV3-27,IGLV3-26,IGLV3-25,IGLVVI-22-1,IGLV3-24,IGLVVI-25-1,IGLV3-22,IGLV3-21,IGLV3-19,IGLV3-17,IGLV3-16,IGLV3-15,IGLV3-13,IGLV3-12,IGLV3-10,IGLV3-9,IGLV3-7,IGLV3-6,IGLV3-4,IGLV3-2,IGLV3-1,IGLV2-28,IGLV2-23,IGLV2-18,IGLV2-14,IGLV2-11,IGLV2-8,IGLV2-5,IGLV1-41,IGLV1-40,IGLV1-36,IGLJ2,IGLJ1,POM121L1P,ASH2LP1,IGLC1,ZNF280B,…
Pubmed	11298326	Evolutionary dynamics of the human immunoglobulin kappa locus and the germline repertoire of the Vkappa genes.	Pubmed	1.131e-43	1.927e-39	6.424e-40	6.63e-39	27	36	IGKV6D-41,IGKV6D-21,IGKV3D-34,IGKV3D-31,IGKV3D-25,IGKV3D-20,IGKV3D-15,IGKV3D-11,IGKV2D-30,IGKV2D-29,IGKV2D-28,IGKV2D-26,IGKV2D-24,IGKV2D-23,IGKV2D-19,IGKV2D-18,IGKV2D-14,IGKV2D-10,IGKV1D-42,IGKV1D-33,IGKV1D-32,IGKV1D-27,IGKV1D-22,IGKV1D-17,IGKV1D-16,IGKV1D-13,IGKV1D-12
Pubmed	8951372	Sequence and evolution of the human germline V lambda repertoire.	Pubmed	5.088e-38	8.672e-34	2.168e-34	2.238e-33	27	49	IGLV7-35,IGLV5-37,IGLV3-31,IGLV3-30,IGLV3-29,IGLV3-26,IGLV3-25,IGLV3-22,IGLV3-17,IGLV3-16,IGLV3-13,IGLV3-12,IGLV3-10,IGLV3-9,IGLV3-7,IGLV3-6,IGLV3-2,IGLV2-28,IGLV2-18,IGLV2-14,IGLV2-11,IGLV2-8,IGLV2-5,IGLV1-36,TRBV12-3,TRBV6-4,TRBC2
Pubmed	11726556	The IC-SNURF-SNRPN transcript serves as a host for multiple small nucleolar RNA species and as an antisense RNA for UBE3A.	Pubmed	1.923e-31	3.278e-27	6.556e-28	6.767e-27	28	85	SNORD109A,SNORD116-18,SNORD116-20,SNORD116-16,SNORD116-17,SNORD116-14,SNORD116-15,SNORD116-12,SNORD116-13,SNORD116-26,SNORD116-25,SNORD116-23,SNORD116-24,SNORD116-21,SNORD116-22,SNORD116-2,SNORD116-3,SNORD116-1,SNORD116-10,SNORD116-11,SNORD116-8,SNORD116-9,SNORD116-6,SNORD116-7,SNORD116-4,SNORD116-5,SNORD116-19,SNHG14
Pubmed	11106375	Identification of brain-specific and imprinted small nucleolar RNA genes exhibiting an unusual genomic organization.	Pubmed	5.001e-30	8.523e-26	1.421e-26	1.466e-25	27	84	SNORD116-18,SNORD116-20,SNORD116-16,SNORD116-17,SNORD116-14,SNORD116-15,SNORD116-12,SNORD116-13,SNORD116-26,SNORD116-25,SNORD116-23,SNORD116-24,SNORD116-21,SNORD116-22,SNORD116-2,SNORD116-3,SNORD116-1,SNORD116-10,SNORD116-11,SNORD116-8,SNORD116-9,SNORD116-6,SNORD116-7,SNORD116-4,SNORD116-5,SNORD116-19,SNHG14
Pubmed	11955599	Recognition of immunoglobulins by Fcgamma receptors.	Pubmed	2.864e-25	4.881e-21	6.973e-22	7.196e-21	20	48	IGLV5-37,IGLV4-3,IGLV3-27,IGLV3-25,IGLV3-22,IGLV3-16,IGLV3-12,IGLV2-23,IGLV2-18,IGLV2-14,IGLV2-11,IGLV1-40,IGLV1-36,IGKV3D-20,IGKV3D-11,IGKV1D-33,IGKV3-20,IGKV2-24,IGLC1,IGKV1-5
Pubmed	10427970	Characteristics of the immunoglobulin Vkappa genes, pseudogenes, relics and orphons in the mouse genome.	Pubmed	9.693e-25	1.652e-20	2.065e-21	2.131e-20	15	20	IGKV6D-21,IGKV2D-28,IGKV1D-33,IGKV1D-17,IGKV1D-13,IGKV6-21,IGKV2-28,IGKV1-27,IGKV1-17,IGKV1-16,IGKV1-13,IGKV1-9,IGKV1-8,IGKV1-6,IGKV1-5
Pubmed	8223863	The V kappa genes of the L regions and the repertoire of V kappa gene sequences in the human germ line.	Pubmed	3.344e-24	5.699e-20	6.332e-21	6.535e-20	14	17	IGKV3D-15,IGKV3D-11,IGKV2D-14,IGKV2D-10,IGKV1D-42,IGKV1D-17,IGKV1D-13,IGKV1D-12,IGKV3-11,IGKV3-7,IGKV2-14,IGKV2-4,IGKV1-17,IGKV1-12
Pubmed	20399194	Human myeloperoxidase in innate and acquired immunity.	Pubmed	3.149e-21	5.367e-17	5.314e-18	5.485e-17	13	18	IGKV6D-21,IGKV2D-28,IGKV1D-33,IGKV1D-13,IGKV1D-12,IGKV6-21,IGKV2-28,IGKV1-27,IGKV1-13,IGKV1-12,IGKV1-9,IGKV1-8,IGKV1-5
Pubmed	1249422	Activation of C1r by proteolytic cleavage.	Pubmed	3.43e-21	5.846e-17	5.314e-18	5.485e-17	17	43	IGLV5-37,IGLV4-3,IGLV3-27,IGLV3-25,IGLV3-22,IGLV3-16,IGLV3-12,IGLV2-23,IGLV2-18,IGLV2-14,IGLV2-11,IGLV1-40,IGLV1-36,IGKV3D-20,IGKV1D-33,IGKV2-24,IGKV1-5
Pubmed	814163	Physicochemical and functional characterization of the C1r subunit of the first complement component.	Pubmed	2.125e-20	3.622e-16	3.018e-17	3.115e-16	17	47	IGLV5-37,IGLV4-3,IGLV3-27,IGLV3-25,IGLV3-22,IGLV3-16,IGLV3-12,IGLV2-23,IGLV2-18,IGLV2-14,IGLV2-11,IGLV1-40,IGLV1-36,IGKV3D-11,IGKV2-24,IGLC1,IGKV1-5
Pubmed	1551402	The human immunoglobulin kappa locus. Characterization of the duplicated A regions.	Pubmed	1.732e-19	2.951e-15	2.27e-16	2.343e-15	10	10	IGKV2D-30,IGKV2D-24,IGKV2D-18,IGKV1D-17,IGKV6-21,IGKV2-30,IGKV2-29,IGKV2-28,IGKV2-18,IGKV1-27
Pubmed	8011175	The human immunoglobulin kappa locus: pseudogenes, unique and repetitive sequences.	Pubmed	5.152e-19	8.78e-15	6.271e-16	6.472e-15	12	18	IGKV3D-25,IGKV2D-23,IGKV2D-19,IGKV1D-22,IGKV3-34,IGKV3-31,IGKV2-36,IGKV2-26,IGKV2-23,IGKV1-35,IGKV1-32,IGKV1-22
Pubmed	22959273	Long noncoding RNAs with snoRNA ends.	Pubmed	1.882e-18	3.207e-14	2.005e-15	2.069e-14	10	11	SNORD116-18,SNORD116-20,SNORD116-14,SNORD116-13,SNORD116-26,SNORD116-21,SNORD116-6,SNORD116-7,SNORD116-19,SNHG14
Pubmed	1660526	The genomic structure of human V beta 6 T cell antigen receptor genes.	Pubmed	1.882e-18	3.207e-14	2.005e-15	2.069e-14	10	11	TRBV28,TRBV16,TRBV11-3,TRBV7-3,TRBV7-2,TRBV7-1,TRBV6-4,TRBV6-2,TRBV6-1,TRBV5-3
Pubmed	15608191	IMGT/GENE-DB: a comprehensive database for human and mouse immunoglobulin and T cell receptor genes.	Pubmed	2.63e-16	4.482e-12	2.637e-13	2.721e-12	17	77	IGKV3D-20,IGKV3D-15,IGKV3D-11,IGKV1D-33,IGKV1D-17,IGKV1D-13,IGKV3-20,IGKV3-15,IGKV1-17,IGKV1-16,IGKV1-13,IGKV1-6,IGKV1-5,TRBV12-4,TRBV12-3,TRBV4-2,TRBV4-1
Pubmed	19446021	Eukaryotic snoRNAs: a paradigm for gene expression flexibility.	Pubmed	3.079e-13	5.248e-09	2.916e-10	3.009e-09	28	374	SNORD60,SNORD109A,SNORD116-18,SNORD116-20,SNORD116-16,SNORD116-17,SNORD116-14,SNORD116-15,SNORD116-12,SNORD116-13,SNORD116-26,SNORD116-25,SNORD116-23,SNORD116-24,SNORD116-21,SNORD116-22,SNORD116-2,SNORD116-3,SNORD116-1,SNORD116-10,SNORD116-11,SNORD116-8,SNORD116-9,SNORD116-6,SNORD116-7,SNORD116-4,SNORD116-5,SNORD116-19
Pubmed	2997718	Sequence of the D beta 2-J beta 2 region of the human T-cell receptor beta-chain locus.	Pubmed	5.952e-13	1.014e-08	5.339e-10	5.51e-09	7	8	TRBJ2-6,TRBJ2-5,TRBJ2-4,TRBJ2-3,TRBJ2-2P,TRBJ2-2,TRBJ2-1
Pubmed	25089626	Differences in gene expression between mouse and human for dynamically regulated genes in early embryo.	Pubmed	1.83e-12	3.12e-08	1.56e-09	1.61e-08	10	28	PRAMEF10,PRAMEF11,PRAMEF33,PRAMEF19,PRAMEF15,PRAMEF4,NLRP2,PRAMEF14,PRAMEF2,PRAMEF17
Pubmed	26694250	Preferentially Expressed Antigen in Melanoma (PRAME) and the PRAME Family of Leucine-Rich Repeat Proteins.	Pubmed	1.937e-12	3.3e-08	1.572e-09	1.622e-08	9	20	PRAMEF10,PRAMEF11,PRAMEF33,PRAMEF19,PRAMEF15,PRAMEF4,PRAMEF14,PRAMEF2,PRAMEF17
Pubmed	11160223	Differential transcriptional regulation of individual TCR V beta segments before gene rearrangement.	Pubmed	2.647e-12	4.512e-08	1.962e-09	2.025e-08	7	9	MOXD2P,PRSS1,PRSS2,TRBV12-4,TRBV12-3,TRBV4-2,TRBV4-1
Pubmed	6777049	Variation in the crossover point of kappa immunoglobulin gene V-J recombination: evidence from a cryptic gene.	Pubmed	2.647e-12	4.512e-08	1.962e-09	2.025e-08	7	9	IGKV1D-17,IGKV1D-13,IGKV1-17,IGKV1-16,IGKV1-13,IGKV1-6,IGKV1-5
Pubmed	38786026	Thirteen Ovary-Enriched Genes Are Individually Not Essential for Female Fertility in Mice.	Pubmed	4.091e-12	6.973e-08	2.905e-09	2.999e-08	10	30	PRAMEF10,PRAMEF11,PRAMEF33,PRAMEF19,PRAMEF15,PRAMEF4,NLRP2,PRAMEF14,PRAMEF2,PRAMEF17
Pubmed	31729367	Sertoli cell-only phenotype and scRNA-seq define PRAMEF12 as a factor essential for spermatogenesis in mice.	Pubmed	5.6e-12	9.544e-08	3.584e-09	3.699e-08	9	22	PRAMEF10,PRAMEF11,PRAMEF33,PRAMEF19,PRAMEF15,PRAMEF4,PRAMEF14,PRAMEF2,PRAMEF17
Pubmed	21290787	15q13.3 Recurrent Deletion	Pubmed	5.678e-12	9.677e-08	3.584e-09	3.699e-08	6	6	CHRNA7,TRPM1,FAN1,KLF13,ARHGAP11B,OTUD7A
Pubmed	3351922	The human VK locus. Characterization of a duplicated region encoding 28 different immunoglobulin genes.	Pubmed	5.678e-12	9.677e-08	3.584e-09	3.699e-08	6	6	IGKV3D-20,IGKV2D-28,IGKV2D-26,IGKV3-20,IGKV2-24,IGKV2-19
Pubmed	23535730	GWAS meta-analysis and replication identifies three new susceptibility loci for ovarian cancer.	Pubmed	8.576e-12	1.462e-07	5.22e-09	5.388e-08	10	32	SYNRG,ACACA,GPR179,SOCS7,ARHGAP23,MRPL45,TADA2A,HNF1B,DDX52,DUSP14
Pubmed	37451217	MAGE-B4, a binding partner of PRAMEF12, is dispensable for spermatogenesis and male fertility in mice.	Pubmed	2.219e-11	3.782e-07	1.263e-08	1.303e-07	9	25	PRAMEF10,PRAMEF11,PRAMEF33,PRAMEF19,PRAMEF15,PRAMEF4,PRAMEF14,PRAMEF2,PRAMEF17
Pubmed	6795447	Amino acid sequence of the variable region of M149 mouse myeloma light chain: comparison with the nucleotide sequence of K2 and K3 clones.	Pubmed	2.371e-11	4.041e-07	1.263e-08	1.303e-07	7	11	IGKV1D-33,IGKV1D-13,IGKV1-27,IGKV1-13,IGKV1-9,IGKV1-8,IGKV1-5
Pubmed	279004	Multiple related immunoglobulin variable-region genes identified by cloning and sequence analysis.	Pubmed	2.371e-11	4.041e-07	1.263e-08	1.303e-07	7	11	IGKV1D-33,IGKV1D-13,IGKV1-27,IGKV1-13,IGKV1-9,IGKV1-8,IGKV1-5
Pubmed	6767723	Organization and complete sequence of identical embryonic and plasmacytoma kappa V-region genes.	Pubmed	2.371e-11	4.041e-07	1.263e-08	1.303e-07	7	11	IGKV1D-33,IGKV1D-13,IGKV1-27,IGKV1-13,IGKV1-9,IGKV1-8,IGKV1-5
Pubmed	23894331	The promoter of the oocyte-specific gene, Oog1, functions in both male and female meiotic germ cells in transgenic mice.	Pubmed	3.873e-11	6.6e-07	1.833e-08	1.892e-07	8	18	PRAMEF10,PRAMEF11,PRAMEF19,PRAMEF15,PRAMEF4,PRAMEF14,PRAMEF2,PRAMEF17
Pubmed	12890732	Oogenesin is a novel mouse protein expressed in oocytes and early cleavage-stage embryos.	Pubmed	3.873e-11	6.6e-07	1.833e-08	1.892e-07	8	18	PRAMEF10,PRAMEF11,PRAMEF19,PRAMEF15,PRAMEF4,PRAMEF14,PRAMEF2,PRAMEF17
Pubmed	29731491	Oocyte-specific gene Oog1 suppresses the expression of spermatogenesis-specific genes in oocytes.	Pubmed	3.873e-11	6.6e-07	1.833e-08	1.892e-07	8	18	PRAMEF10,PRAMEF11,PRAMEF19,PRAMEF15,PRAMEF4,PRAMEF14,PRAMEF2,PRAMEF17
Pubmed	14675769	Identification of a new expanding family of genes characterized by atypical LRR domains. Localization of a cluster preferentially expressed in oocyte.	Pubmed	3.873e-11	6.6e-07	1.833e-08	1.892e-07	8	18	PRAMEF10,PRAMEF11,PRAMEF19,PRAMEF15,PRAMEF4,PRAMEF14,PRAMEF2,PRAMEF17
Pubmed	28604677	Pramel7 mediates ground-state pluripotency through proteasomal-epigenetic combined pathways.	Pubmed	6.611e-11	1.127e-06	3.045e-08	3.143e-07	8	19	PRAMEF10,PRAMEF11,PRAMEF19,PRAMEF15,PRAMEF4,PRAMEF14,PRAMEF2,PRAMEF17
Pubmed	16580637	Oog1, an oocyte-specific protein, interacts with Ras and Ras-signaling proteins during early embryogenesis.	Pubmed	1.089e-10	1.856e-06	4.758e-08	4.911e-07	8	20	PRAMEF10,PRAMEF11,PRAMEF19,PRAMEF15,PRAMEF4,PRAMEF14,PRAMEF2,PRAMEF17
Pubmed	21425410	Pramel7 mediates LIF/STAT3-dependent self-renewal in embryonic stem cells.	Pubmed	1.089e-10	1.856e-06	4.758e-08	4.911e-07	8	20	PRAMEF10,PRAMEF11,PRAMEF19,PRAMEF15,PRAMEF4,PRAMEF14,PRAMEF2,PRAMEF17
Pubmed	10941842	Extensive gene duplications and a large inversion characterize the human leukocyte receptor cluster.	Pubmed	2.381e-10	4.058e-06	1.015e-07	1.047e-06	7	14	TSEN34,MBOAT7,LENG1,LILRA6,CNOT3,LILRB3,LAIR2
Pubmed	19480014	Oogenesis specific genes (Nobox, Oct4, Bmp15, Gdf9, Oogenesin1 and Oogenesin2) are differentially expressed during natural and gonadotropin-induced mouse follicular development.	Pubmed	4.091e-10	6.972e-06	1.701e-07	1.755e-06	8	23	PRAMEF10,PRAMEF11,PRAMEF19,PRAMEF15,PRAMEF4,PRAMEF14,PRAMEF2,PRAMEF17
Pubmed	6086934	Organization and evolution of a gene cluster for human immunoglobulin variable regions of the kappa type.	Pubmed	4.274e-10	7.284e-06	1.734e-07	1.79e-06	5	5	IGKV2-10,IGKV1-13,IGKV1-12,IGKV1-9,IGKV1-8
Pubmed	19389355	Retinoic acid receptors are required for skeletal growth, matrix homeostasis and growth plate function in postnatal mouse.	Pubmed	6.81e-10	1.161e-05	2.699e-07	2.786e-06	9	35	PRAMEF10,PRAMEF11,PRAMEF33,PRAMEF19,PRAMEF15,PRAMEF4,PRAMEF14,PRAMEF2,PRAMEF17
Pubmed	17124007	Structure and implied functions of truncated B-cell receptor mRNAs in early embryo and adult mesenchymal stem cells: Cdelta replaces Cmu in mu heavy chain-deficient mice.	Pubmed	7.755e-10	1.322e-05	3.004e-07	3.1e-06	7	16	IGKV1D-17,IGKV1D-13,IGKV1-17,IGKV1-16,IGKV1-13,IGKV1-6,IGKV1-5
Pubmed	12620990	Incomplete reactivation of Oct4-related genes in mouse embryos cloned from somatic nuclei.	Pubmed	8.814e-10	1.502e-05	3.338e-07	3.445e-06	8	25	PRAMEF10,PRAMEF11,PRAMEF19,PRAMEF15,PRAMEF4,PRAMEF14,PRAMEF2,PRAMEF17
Pubmed	18500982	Expression profiling in transgenic FVB/N embryonic stem cells overexpressing STAT3.	Pubmed	1.258e-09	2.144e-05	4.627e-07	4.775e-06	8	26	PRAMEF10,PRAMEF11,PRAMEF19,PRAMEF15,PRAMEF4,PRAMEF14,PRAMEF2,PRAMEF17
Pubmed	23565261	Differential expression of PRAMEL1, a cancer/testis antigen, during spermatogenesis in the mouse.	Pubmed	1.303e-09	2.221e-05	4.627e-07	4.775e-06	7	17	PRAMEF10,PRAMEF11,PRAMEF19,PRAMEF15,PRAMEF4,PRAMEF2,PRAMEF17
Pubmed	37781892	Mouse Pramel1 regulates spermatogonial development by inhibiting retinoic acid signaling during spermatogenesis.	Pubmed	1.303e-09	2.221e-05	4.627e-07	4.775e-06	7	17	PRAMEF10,PRAMEF11,PRAMEF19,PRAMEF15,PRAMEF4,PRAMEF2,PRAMEF17
Pubmed	39181896	Pramel15 facilitates zygotic nuclear DNMT1 degradation and DNA demethylation.	Pubmed	2.108e-09	3.592e-05	7.331e-07	7.566e-06	7	18	PRAMEF10,PRAMEF11,PRAMEF19,PRAMEF15,PRAMEF4,PRAMEF2,PRAMEF17
Pubmed	24429156	Genetic variants associated with idiopathic pulmonary fibrosis susceptibility and mortality: a genome-wide association study.	Pubmed	2.478e-09	4.222e-05	8.003e-07	8.26e-06	6	11	MAPT,MAPT-AS1,CRHR1,KANSL1,SPPL2C,STH
Pubmed	4691517	Mouse immunoglobulin chains. Pattern of sequence variation among kappa chains with limited sequence differences.	Pubmed	2.536e-09	4.322e-05	8.003e-07	8.26e-06	5	6	IGKV3D-20,IGKV3D-15,IGKV3D-11,IGKV3-20,IGKV3-15
Pubmed	30068593	Glatiramer Acetate Enhances Myeloid-Derived Suppressor Cell Function via Recognition of Paired Ig-like Receptor B.	Pubmed	2.536e-09	4.322e-05	8.003e-07	8.26e-06	5	6	LILRB2,LILRB5,LILRA1,LILRB3,LILRA2
Pubmed	98179	Primary structures of N-terminal extra peptide segments linked to the variable and constant regions of immunoglobulin light chain precursors: implications on the organization and controlled expression of immunoglobulin genes.	Pubmed	2.536e-09	4.322e-05	8.003e-07	8.26e-06	5	6	IGKV3D-20,IGKV3D-15,IGKV3D-11,IGKV3-20,IGKV3-15
Pubmed	99744	Mechanisms of antibody diversity: multiple genes encode structurally related mouse kappa variable regions.	Pubmed	2.536e-09	4.322e-05	8.003e-07	8.26e-06	5	6	IGKV3D-20,IGKV3D-15,IGKV3D-11,IGKV3-20,IGKV3-15
Pubmed	7951227	Human immunoglobulin VH and D segments on chromosomes 15q11.2 and 16p11.2.	Pubmed	5.016e-09	8.549e-05	1.554e-06	1.604e-05	7	20	IGHV3OR16-13,IGHV3OR16-15,IGHV3OR16-12,IGHV3OR16-11,IGHV3OR16-10,IGHV3OR16-7,IGHV1OR16-2
Pubmed	37889087	LSM14B is essential for oocyte meiotic maturation by regulating maternal mRNA storage and clearance.	Pubmed	7.893e-09	0.0001345	2.402e-06	2.479e-05	8	32	PRAMEF10,PRAMEF11,PRAMEF19,PRAMEF15,PRAMEF4,PRAMEF14,PRAMEF2,PRAMEF17
Pubmed	17998301	Differential expression of leukocyte immunoglobulin-like receptors on cord-blood-derived human mast cell progenitors and mature mast cells.	Pubmed	8.777e-09	0.0001496	2.493e-06	2.573e-05	5	7	LILRB2,LILRB5,LILRA1,LILRB3,LILRA2
Pubmed	8020962	Nucleotide sequence analysis of 77.7 kb of the human V beta T-cell receptor gene locus: direct primer-walking using cosmid template DNAs.	Pubmed	8.777e-09	0.0001496	2.493e-06	2.573e-05	5	7	TRBV15,TRBV13,TRBV10-3,TRBV5-6,TRBV5-4
Pubmed	3866244	Organization and sequences of the diversity, joining, and constant region genes of the human T-cell receptor beta chain.	Pubmed	8.777e-09	0.0001496	2.493e-06	2.573e-05	5	7	TRBJ2-7,TRBJ1-6,TRBJ1-5,TRBJ1-4,TRBJ1-3
Pubmed	9603450	The 3' part of the immunoglobulin kappa locus of the mouse.	Pubmed	8.777e-09	0.0001496	2.493e-06	2.573e-05	5	7	IGKV3D-20,IGKV3D-15,IGKV3D-11,IGKV3-20,IGKV3-15
Pubmed	31806660	DUX is a non-essential synchronizer of zygotic genome activation.	Pubmed	2.022e-08	0.0003446	5.648e-06	5.83e-05	9	50	PRAMEF10,PRAMEF11,PRAMEF33,PRAMEF19,PRAMEF15,PRAMEF4,PRAMEF14,PRAMEF2,PRAMEF17
Pubmed	9548455	A family of human lymphoid and myeloid Ig-like receptors, some of which bind to MHC class I molecules.	Pubmed	2.315e-08	0.0003945	6.363e-06	6.567e-05	5	8	LILRB2,LILRB5,LILRA1,LILRB3,LILRA2
Pubmed	9144225	A novel pair of immunoglobulin-like receptors expressed by B cells and myeloid cells.	Pubmed	2.564e-08	0.000437	6.937e-06	7.159e-05	6	15	LILRB2,LILRB5,LILRA1,LILRB3,LILRA2,LAIR2
Pubmed	6264318	Differences between germ-line and rearranged immunoglobulin V kappa coding sequences suggest a localized mutation mechanism.	Pubmed	3.21e-08	0.000547	7.705e-06	7.952e-05	4	4	IGKV6D-21,IGKV1D-12,IGKV6-21,IGKV1-12
Pubmed	3927006	A large section of the gene locus encoding human immunoglobulin variable regions of the kappa type is duplicated.	Pubmed	3.21e-08	0.000547	7.705e-06	7.952e-05	4	4	IGKV3D-11,IGKV2D-10,IGKV1D-13,IGKV1D-12
Pubmed	15480765	In angioimmunoblastic T-cell lymphoma, neoplastic T cells may be a minor cell population. A molecular single-cell and immunohistochemical study.	Pubmed	3.21e-08	0.000547	7.705e-06	7.952e-05	4	4	TRBV16,TRBV6-1,TRBV4-1,TRBC1
Pubmed	3456168	Murine T-cell receptor mutants with deletions of beta-chain variable region genes.	Pubmed	3.21e-08	0.000547	7.705e-06	7.952e-05	4	4	TRBV12-4,TRBV12-3,TRBV4-2,TRBV4-1
Pubmed	16982806	Expression of 4 genes between chromosome 15 breakpoints 1 and 2 and behavioral outcomes in Prader-Willi syndrome.	Pubmed	3.21e-08	0.000547	7.705e-06	7.952e-05	4	4	TUBGCP5,CYFIP1,NIPA2,NIPA1
Pubmed	3470773	Tandem linkage and unusual RNA splicing of the T-cell receptor beta-chain variable-region genes.	Pubmed	3.21e-08	0.000547	7.705e-06	7.952e-05	4	4	TRBV12-4,TRBV12-3,TRBV4-2,TRBV4-1
Pubmed	14508708	Identification of four highly conserved genes between breakpoint hotspots BP1 and BP2 of the Prader-Willi/Angelman syndromes deletion region that have undergone evolutionary transposition mediated by flanking duplicons.	Pubmed	3.21e-08	0.000547	7.705e-06	7.952e-05	4	4	TUBGCP5,CYFIP1,NIPA2,NIPA1
Pubmed	14508709	Slowed conduction and thin myelination of peripheral nerves associated with mutant rho Guanine-nucleotide exchange factor 10.	Pubmed	3.21e-08	0.000547	7.705e-06	7.952e-05	4	4	CLN8,DLGAP2,ARHGEF10,KBTBD11
Pubmed	16280085	Genetic mapping of putative Chrna7 and Luzp2 neuronal transcriptional enhancers due to impact of a transgene-insertion and 6.8 Mb deletion in a mouse model of Prader-Willi and Angelman syndromes.	Pubmed	3.97e-08	0.0006766	9.398e-06	9.699e-05	7	26	TUBGCP5,CHRNA7,TRPM1,APBA2,KLF13,TJP1,OTUD7A
Pubmed	17554679	Analysis of a new allele of limb deformity (ld) reveals tissue- and age-specific transcriptional effects of the Ld Global Control Region.	Pubmed	5.15e-08	0.0008778	1.202e-05	0.0001241	5	9	FMN1,SCG5,ARHGAP11A,ARHGAP11B,GREM1
Pubmed	22516433	Proteomic analysis of microvesicles from plasma of healthy donors reveals high individual variability.	Pubmed	7.687e-08	0.00131	1.77e-05	0.0001827	13	143	IGLV3-25,IGLV3-21,IGKV3D-11,IGKV2D-28,IGKV1D-33,IGKV1D-12,IGKV3-20,IGKV3-15,IGKV2-30,IGKV1-17,IGLC1,PRSS1,IGKV1-5
Pubmed	18802077	Inhibitory immunoglobulin-like receptors LILRB and PIR-B negatively regulate osteoclast development.	Pubmed	1.019e-07	0.001736	2.315e-05	0.0002389	5	10	LILRB2,LILRB5,LILRA1,LILRB3,LILRA2
Pubmed	18787130	Regulation of cytotoxic T lymphocyte triggering by PIR-B on dendritic cells.	Pubmed	1.588e-07	0.002706	2.577e-05	0.000266	4	5	LILRB2,LILRB5,LILRA1,LILRA2
Pubmed	27443384	PirB Overexpression Exacerbates Neuronal Apoptosis by Inhibiting TrkB and mTOR Phosphorylation After Oxygen and Glucose Deprivation Injury.	Pubmed	1.588e-07	0.002706	2.577e-05	0.000266	4	5	LILRB2,LILRB5,LILRA1,LILRA2
Pubmed	15494528	The inhibitory receptor PIR-B negatively regulates neutrophil and macrophage integrin signaling.	Pubmed	1.588e-07	0.002706	2.577e-05	0.000266	4	5	LILRB2,LILRB5,LILRA1,LILRA2
Pubmed	37146940	PirB negatively regulates the inflammatory activation of astrocytes in a mouse model of sleep deprivation.	Pubmed	1.588e-07	0.002706	2.577e-05	0.000266	4	5	LILRB2,LILRB5,LILRA1,LILRA2
Pubmed	24302763	PirB regulates a structural substrate for cortical plasticity.	Pubmed	1.588e-07	0.002706	2.577e-05	0.000266	4	5	LILRB2,LILRB5,LILRA1,LILRA2
Pubmed	23927735	Spatio-temporal expression of paired immunoglobulin-like receptor-B in the adult mouse brain after focal cerebral ischaemia.	Pubmed	1.588e-07	0.002706	2.577e-05	0.000266	4	5	LILRB2,LILRB5,LILRA1,LILRA2
Pubmed	21087927	Paired immunoglobulin-like receptor B knockout does not enhance axonal regeneration or locomotor recovery after spinal cord injury.	Pubmed	1.588e-07	0.002706	2.577e-05	0.000266	4	5	LILRB2,LILRB5,LILRA1,LILRA2
Pubmed	20398663	Paired immunoglobulin-like receptor B (PIR-B) negatively regulates macrophage activation in experimental colitis.	Pubmed	1.588e-07	0.002706	2.577e-05	0.000266	4	5	LILRB2,LILRB5,LILRA1,LILRA2
Pubmed	22948046	Regulation of plasmacytoid dendritic cell responses by PIR-B.	Pubmed	1.588e-07	0.002706	2.577e-05	0.000266	4	5	LILRB2,LILRB5,LILRA1,LILRA2
Pubmed	9054430	Molecular cloning of a novel murine cell-surface glycoprotein homologous to killer cell inhibitory receptors.	Pubmed	1.588e-07	0.002706	2.577e-05	0.000266	4	5	LILRB2,LILRB5,LILRA1,LILRA2
Pubmed	27324131	Paired Ig-like Receptor B Inhibits IL-13-Driven Eosinophil Accumulation and Activation in the Esophagus.	Pubmed	1.588e-07	0.002706	2.577e-05	0.000266	4	5	LILRB2,LILRB5,LILRA1,LILRA2
Pubmed	25075127	Paired immunoglobulin-like receptor B regulates platelet activation.	Pubmed	1.588e-07	0.002706	2.577e-05	0.000266	4	5	LILRB2,LILRB5,LILRA1,LILRA2
Pubmed	16011512	Paired immunoglobulin-like receptors and their MHC class I recognition.	Pubmed	1.588e-07	0.002706	2.577e-05	0.000266	4	5	LILRB2,LILRB5,LILRA1,LILRA2
Pubmed	2821625	Germline organization of the murine T cell receptor beta-chain genes.	Pubmed	1.588e-07	0.002706	2.577e-05	0.000266	4	5	TRBV12-4,TRBV12-3,TRBV4-2,TRBV4-1
Pubmed	12403357	Mast cell regulation via paired immunoglobulin-like receptor PIR-B.	Pubmed	1.588e-07	0.002706	2.577e-05	0.000266	4	5	LILRB2,LILRB5,LILRA1,LILRA2
Pubmed	34242819	PIR-B Regulates CD4+ IL17a+ T-Cell Survival and Restricts T-Cell-Dependent Intestinal Inflammatory Responses.	Pubmed	1.588e-07	0.002706	2.577e-05	0.000266	4	5	LILRB2,LILRB5,LILRA1,LILRA2
Pubmed	20976309	Role of PIR-B in autoimmune glomerulonephritis.	Pubmed	1.588e-07	0.002706	2.577e-05	0.000266	4	5	LILRB2,LILRB5,LILRA1,LILRA2
Pubmed	20881122	Genetic deletion of paired immunoglobulin-like receptor B does not promote axonal plasticity or functional recovery after traumatic brain injury.	Pubmed	1.588e-07	0.002706	2.577e-05	0.000266	4	5	LILRB2,LILRB5,LILRA1,LILRA2
Pubmed	19684158	Ectopically expressed PIR-B on T cells constitutively binds to MHC class I and attenuates T helper type 1 responses.	Pubmed	1.588e-07	0.002706	2.577e-05	0.000266	4	5	LILRB2,LILRB5,LILRA1,LILRA2
Pubmed	34120891	PirB functions as an intrinsic suppressor in hippocampal neural stem cells.	Pubmed	1.588e-07	0.002706	2.577e-05	0.000266	4	5	LILRB2,LILRB5,LILRA1,LILRA2
Pubmed	34437845	Enhancing motor learning by increasing the stability of newly formed dendritic spines in the motor cortex.	Pubmed	1.588e-07	0.002706	2.577e-05	0.000266	4	5	LILRB2,LILRB5,LILRA1,LILRA2
Pubmed	37147336	Paired immunoglobulin-like receptor B is an entry receptor for mammalian orthoreovirus.	Pubmed	1.588e-07	0.002706	2.577e-05	0.000266	4	5	LILRB2,LILRB5,LILRA1,LILRA2
Pubmed	33653799	Tumor-derived ILT4 induces T cell senescence and suppresses tumor immunity.	Pubmed	1.588e-07	0.002706	2.577e-05	0.000266	4	5	LILRB2,LILRB5,LILRA1,LILRA2
Pubmed	30674550	Structure and flexibility of the extracellular region of the PirB receptor.	Pubmed	1.588e-07	0.002706	2.577e-05	0.000266	4	5	LILRB2,LILRB5,LILRA1,LILRA2
Pubmed	23152562	Inhibitory receptor paired Ig-like receptor B is exploited by Staphylococcus aureus for virulence.	Pubmed	1.588e-07	0.002706	2.577e-05	0.000266	4	5	LILRB2,LILRB5,LILRA1,LILRA2
Pubmed	10359805	Paternal monoallelic expression of the paired immunoglobulin-like receptors PIR-A and PIR-B.	Pubmed	1.588e-07	0.002706	2.577e-05	0.000266	4	5	LILRB2,LILRB5,LILRA1,LILRA2
Pubmed	10586026	Characterization of paired Ig-like receptors in rats.	Pubmed	1.588e-07	0.002706	2.577e-05	0.000266	4	5	LILRB2,LILRB5,LILRA1,LILRA2
Pubmed	9550322	Genomic structure of PIR-B, the inhibitory member of the paired immunoglobulin-like receptor genes in mice.	Pubmed	1.588e-07	0.002706	2.577e-05	0.000266	4	5	LILRB2,LILRB5,LILRA1,LILRA2
Pubmed	22102155	Expression of PirB protein in intact and injured optic nerve and retina of mice.	Pubmed	1.588e-07	0.002706	2.577e-05	0.000266	4	5	LILRB2,LILRB5,LILRA1,LILRA2
Pubmed	23258232	Paired immunoglobulin-like receptor-B inhibits pulmonary fibrosis by suppressing profibrogenic properties of alveolar macrophages.	Pubmed	1.588e-07	0.002706	2.577e-05	0.000266	4	5	LILRB2,LILRB5,LILRA1,LILRA2
Pubmed	17287250	Mbd3, a component of the NuRD co-repressor complex, is required for development of pluripotent cells.	Pubmed	1.661e-07	0.002831	2.671e-05	0.0002756	8	46	PRAMEF10,PRAMEF11,PRAMEF19,PRAMEF15,PRAMEF4,PRAMEF14,PRAMEF2,PRAMEF17
Pubmed	24052308	Human LilrB2 is a β-amyloid receptor and its murine homolog PirB regulates synaptic plasticity in an Alzheimer's model.	Pubmed	1.847e-07	0.003148	2.942e-05	0.0003036	5	11	LILRB2,LILRB5,LILRA1,LILRB3,LILRA2
Pubmed	12207326	HLA-G inhibits the functions of murine dendritic cells via the PIR-B immune inhibitory receptor.	Pubmed	4.713e-07	0.008032	6.226e-05	0.0006426	4	6	LILRB2,LILRB5,LILRA1,LILRA2
Pubmed	9824165	The major SHP-1-binding, tyrosine-phosphorylated protein in macrophages is a member of the KIR/LIR family and an SHP-1 substrate.	Pubmed	4.713e-07	0.008032	6.226e-05	0.0006426	4	6	LILRB2,LILRB5,LILRA1,LILRA2
Pubmed	38383888	CaSSiDI: novel single-cell "Cluster Similarity Scoring and Distinction Index" reveals critical functions for PirB and context-dependent Cebpb repression.	Pubmed	4.713e-07	0.008032	6.226e-05	0.0006426	4	6	LILRB2,LILRB5,LILRA1,LILRA2
Pubmed	39095838	Inhibition of ANGPTL8 protects against diabetes-associated cognitive dysfunction by reducing synaptic loss via the PirB signaling pathway.	Pubmed	4.713e-07	0.008032	6.226e-05	0.0006426	4	6	LILRB2,LILRB5,LILRA1,LILRA2
Pubmed	18768880	PIR-B-deficient mice are susceptible to Salmonella infection.	Pubmed	4.713e-07	0.008032	6.226e-05	0.0006426	4	6	LILRB2,LILRB5,LILRA1,LILRA2
Pubmed	37481670	LILRB2/PirB mediates macrophage recruitment in fibrogenesis of nonalcoholic steatohepatitis.	Pubmed	4.713e-07	0.008032	6.226e-05	0.0006426	4	6	LILRB2,LILRB5,LILRA1,LILRA2
Pubmed	31727773	Dual functions of angiopoietin-like protein 2 signaling in tumor progression and anti-tumor immunity.	Pubmed	4.713e-07	0.008032	6.226e-05	0.0006426	4	6	LILRB2,LILRB5,LILRA1,LILRA2
Pubmed	3772297	Analysis of a human V beta gene subfamily.	Pubmed	4.713e-07	0.008032	6.226e-05	0.0006426	4	6	TRBV12-5,TRBV12-3,TRBV12-2,TRBV12-1
Pubmed	30787106	Systematic and standardized comparison of reported amyloid-β receptors for sufficiency, affinity, and Alzheimer's disease relevance.	Pubmed	4.713e-07	0.008032	6.226e-05	0.0006426	4	6	LILRB2,LILRB5,LILRA1,LILRA2
Pubmed	21636572	Differential but competitive binding of Nogo protein and class i major histocompatibility complex (MHCI) to the PIR-B ectodomain provides an inhibition of cells.	Pubmed	4.713e-07	0.008032	6.226e-05	0.0006426	4	6	LILRB2,LILRB5,LILRA1,LILRA2
Pubmed	24040397	Characterization of regulatory dendritic cells that mitigate acute graft-versus-host disease in older mice following allogeneic bone marrow transplantation.	Pubmed	4.713e-07	0.008032	6.226e-05	0.0006426	4	6	LILRB2,LILRB5,LILRA1,LILRA2
Pubmed	28664612	Autoimmune arthritis induces paired immunoglobulin-like receptor B expression on CD4+ T cells from SKG mice.	Pubmed	4.713e-07	0.008032	6.226e-05	0.0006426	4	6	LILRB2,LILRB5,LILRA1,LILRA2
Pubmed	27752542	Cell-Autonomous Regulation of Dendritic Spine Density by PirB.	Pubmed	4.713e-07	0.008032	6.226e-05	0.0006426	4	6	LILRB2,LILRB5,LILRA1,LILRA2
Pubmed	18988857	PirB is a functional receptor for myelin inhibitors of axonal regeneration.	Pubmed	4.713e-07	0.008032	6.226e-05	0.0006426	4	6	LILRB2,LILRB5,LILRA1,LILRA2
Pubmed	27402837	Mice Deficient in Angiopoietin-like Protein 2 (Angptl2) Gene Show Increased Susceptibility to Bacterial Infection Due to Attenuated Macrophage Activity.	Pubmed	4.713e-07	0.008032	6.226e-05	0.0006426	4	6	LILRB2,LILRB5,LILRA1,LILRA2
Pubmed	28594961	PirB regulates asymmetries in hippocampal circuitry.	Pubmed	4.713e-07	0.008032	6.226e-05	0.0006426	4	6	LILRB2,LILRB5,LILRA1,LILRA2
Pubmed	21881600	The p75 receptor mediates axon growth inhibition through an association with PIR-B.	Pubmed	4.713e-07	0.008032	6.226e-05	0.0006426	4	6	LILRB2,LILRB5,LILRA1,LILRA2
Pubmed	12021780	Impaired dendritic cell maturation and increased T(H)2 responses in PIR-B(-/-) mice.	Pubmed	4.713e-07	0.008032	6.226e-05	0.0006426	4	6	LILRB2,LILRB5,LILRA1,LILRA2
Pubmed	15146181	Exacerbated graft-versus-host disease in Pirb-/- mice.	Pubmed	4.713e-07	0.008032	6.226e-05	0.0006426	4	6	LILRB2,LILRB5,LILRA1,LILRA2
Pubmed	29482582	CAMKs support development of acute myeloid leukemia.	Pubmed	4.713e-07	0.008032	6.226e-05	0.0006426	4	6	LILRB2,LILRB5,LILRA1,LILRA2
Pubmed	25320232	Blocking PirB up-regulates spines and functional synapses to unlock visual cortical plasticity and facilitate recovery from amblyopia.	Pubmed	4.713e-07	0.008032	6.226e-05	0.0006426	4	6	LILRB2,LILRB5,LILRA1,LILRA2
Pubmed	24212998	Paired immunoglobulin-like receptor A is an intrinsic, self-limiting suppressor of IL-5-induced eosinophil development.	Pubmed	4.713e-07	0.008032	6.226e-05	0.0006426	4	6	LILRB2,LILRB5,LILRA1,LILRA2
Pubmed	15723811	The Src family kinases Hck and Fgr negatively regulate neutrophil and dendritic cell chemokine signaling via PIR-B.	Pubmed	6.224e-07	0.01061	8.159e-05	0.0008421	6	24	LILRB2,CCL3,CCL18,LILRB5,LILRA1,LILRA2
Pubmed	17371981	Paired Ig-like receptors bind to bacteria and shape TLR-mediated cytokine production.	Pubmed	1.088e-06	0.01854	0.0001315	0.001357	4	7	LILRB2,LILRB5,LILRA1,LILRA2
Pubmed	19658091	Alternative mRNA splicing creates transcripts encoding soluble proteins from most LILR genes.	Pubmed	1.088e-06	0.01854	0.0001315	0.001357	4	7	LILRB2,LILRA1,LILRB3,LILRA2
Pubmed	24278366	The Nogo-B-PirB axis controls macrophage-mediated vascular remodeling.	Pubmed	1.088e-06	0.01854	0.0001315	0.001357	4	7	LILRB2,LILRB5,LILRA1,LILRA2
Pubmed	36510132	LOTUS suppresses amyloid β-induced dendritic spine elimination through the blockade of amyloid β binding to PirB.	Pubmed	1.088e-06	0.01854	0.0001315	0.001357	4	7	LILRB2,LILRB5,LILRA1,LILRA2
Pubmed	19687229	Augmented TLR9-induced Btk activation in PIR-B-deficient B-1 cells provokes excessive autoantibody production and autoimmunity.	Pubmed	1.088e-06	0.01854	0.0001315	0.001357	4	7	LILRB2,LILRB5,LILRA1,LILRA2
Pubmed	16917027	PirB restricts ocular-dominance plasticity in visual cortex.	Pubmed	1.088e-06	0.01854	0.0001315	0.001357	4	7	LILRB2,LILRB5,LILRA1,LILRA2
Pubmed	35321392	Macrophage Paired Immunoglobulin-Like Receptor B Deficiency Promotes Peripheral Atherosclerosis in Apolipoprotein E-Deficient Mice.	Pubmed	1.088e-06	0.01854	0.0001315	0.001357	4	7	LILRB2,LILRB5,LILRA1,LILRA2
Pubmed	20844138	Oligodendrocyte-myelin glycoprotein and Nogo negatively regulate activity-dependent synaptic plasticity.	Pubmed	1.088e-06	0.01854	0.0001315	0.001357	4	7	LILRB2,LILRB5,LILRA1,LILRA2
Pubmed	21555536	Transcriptional activation of the Pirb gene in B cells by PU.1 and Runx3.	Pubmed	1.088e-06	0.01854	0.0001315	0.001357	4	7	LILRB2,LILRB5,LILRA1,LILRA2
Pubmed	18316626	A dual activation and inhibition role for the paired immunoglobulin-like receptor B in eosinophils.	Pubmed	1.088e-06	0.01854	0.0001315	0.001357	4	7	LILRB2,LILRB5,LILRA1,LILRA2
Pubmed	27897222	NADPH oxidase gp91phox contributes to RANKL-induced osteoclast differentiation by upregulating NFATc1.	Pubmed	1.088e-06	0.01854	0.0001315	0.001357	4	7	LILRB2,LILRB5,LILRA1,LILRA2
Pubmed	18209065	An essential role of sialylated O-linked sugar chains in the recognition of mouse CD99 by paired Ig-like type 2 receptor (PILR).	Pubmed	2.153e-06	0.03669	0.0002446	0.002524	4	8	LILRB2,LILRB5,LILRA1,LILRA2
Pubmed	24449409	NogoR1 and PirB signaling stimulates neural stem cell survival and proliferation.	Pubmed	2.153e-06	0.03669	0.0002446	0.002524	4	8	LILRB2,LILRB5,LILRA1,LILRA2
Pubmed	22660330	Inhibitory receptors bind ANGPTLs and support blood stem cells and leukaemia development.	Pubmed	2.153e-06	0.03669	0.0002446	0.002524	4	8	LILRB2,LILRB5,LILRA1,LILRA2
Pubmed	21376641	Paired immunoglobin-like receptor-B regulates the suppressive function and fate of myeloid-derived suppressor cells.	Pubmed	2.153e-06	0.03669	0.0002446	0.002524	4	8	LILRB2,LILRB5,LILRA1,LILRA2
Pubmed	11829490	A 3-Mb map of a large Segmental duplication overlapping the alpha7-nicotinic acetylcholine receptor gene (CHRNA7) at human 15q13-q14.	Pubmed	2.153e-06	0.03669	0.0002446	0.002524	4	8	CHRNA7,ARHGAP11A,ULK4P2,ARHGAP11B
Pubmed	22504418	Common variants at 6q22 and 17q21 are associated with intracranial volume.	Pubmed	2.153e-06	0.03669	0.0002446	0.002524	4	8	MAPT,CRHR1,KANSL1,STH
Pubmed	19255189	The absence of Hck, Fgr, and Lyn tyrosine kinases augments lung innate immune responses to Pneumocystis murina.	Pubmed	2.153e-06	0.03669	0.0002446	0.002524	4	8	LILRB2,LILRB5,LILRA1,LILRA2
Pubmed	9538215	Genomic structures and chromosomal location of p91, a novel murine regulatory receptor family.	Pubmed	2.153e-06	0.03669	0.0002446	0.002524	4	8	LILRB2,LILRB5,LILRA1,LILRA2
Pubmed	35210567	VCAM1 confers innate immune tolerance on haematopoietic and leukaemic stem cells.	Pubmed	2.153e-06	0.03669	0.0002446	0.002524	4	8	LILRB2,LILRB5,LILRA1,LILRA2
Pubmed	6434993	Identification of a diversity segment of human T-cell receptor beta-chain, and comparison with the analogous murine element.	Pubmed	2.406e-06	0.041	0.0002579	0.002661	3	3	TRBJ1-2,TRBJ1-1,TRBD1
Pubmed	18509094	Haplotypes and gene expression implicate the MAPT region for Parkinson disease: the GenePD Study.	Pubmed	2.406e-06	0.041	0.0002579	0.002661	3	3	MAPT,KANSL1,STH
Pubmed	11439001	Pseudoxanthoma elasticum: Point mutations in the ABCC6 gene and a large deletion including also ABCC1 and MYH11.	Pubmed	2.406e-06	0.041	0.0002579	0.002661	3	3	ABCC1,ABCC6,MYH11
Pubmed	8028600	Genomic organisation of 34 kb of the human immunoglobulin lambda locus (IGLV): restriction map and sequences of new V lambda III genes.	Pubmed	2.406e-06	0.041	0.0002579	0.002661	3	3	IGLVVI-22-1,IGLV3-24,IGLV3-21
Pubmed	8422499	The structure and evolution of the human salivary proline-rich protein gene family.	Pubmed	2.406e-06	0.041	0.0002579	0.002661	3	3	PRB1,PRB4,PRB2
Pubmed	9129202	The chemokine information source: identification and characterization of novel chemokines using the WorldWideWeb and expressed sequence tag databases.	Pubmed	2.406e-06	0.041	0.0002579	0.002661	3	3	CCL15,CCL18,CCL23
Pubmed	1940382	Clonal characterization of the human IgG antibody repertoire to Haemophilus influenzae type b polysaccharide. IV. The less frequently expressed VL are heterogeneous.	Pubmed	2.406e-06	0.041	0.0002579	0.002661	3	3	IGKV1D-33,IGKV1-33,IGKV1-6
Pubmed	18606680	Lambda light chain revision in the human intestinal IgA response.	Pubmed	2.406e-06	0.041	0.0002579	0.002661	3	3	IGLV2-5,IGKV2-29,IGKV2-26
Pubmed	6440122	Immunoglobulin genes of different subgroups are interdigitated within the VK locus.	Pubmed	2.406e-06	0.041	0.0002579	0.002661	3	3	IGKV3D-11,IGKV3-11,IGKV3-7
Disease	EFO_1002013	alcoholic pancreatitis	GWAS	3.385e-13	6.217e-10	6.217e-10	5.032e-09	14	98	PGBD4P1,TRPV6,PRSS58,PRSS3P1,PRSS1,PRSS2,TRBVB,TRBV30,TRBV29-1,TRBV27,TRBJ2-7,TRBD1,TRBC2,WBP1LP1
Disease	EFO_0008305	trypsin-2 measurement	GWAS	1.589e-12	2.92e-09	1.46e-09	1.182e-08	7	11	EPHB6,PGBD4P1,PRSS2,TRBV30,TRBV29-1,TRBJ2-7,TRBC2
Disease	EFO_0004608	cystic fibrosis associated meconium ileus	GWAS	1.568e-09	2.881e-06	9.602e-07	7.771e-06	6	14	PRSS58,RAB7B,PRSS1,TRBV29-1,TRBJ2-7,TRBC2
Disease	EFO_0008219	macrophage inflammatory protein 1b measurement	GWAS	5.008e-09	9.199e-06	2.099e-06	1.699e-05	12	136	ACACA,MRM1,CCL18,CCL23,ARHGAP23,MRPL45,LHX1-DT,YWHAEP7,TADA2A,DDX52,DUSP14,AATF
Disease	MONDO_0004992	cancer	GWAS	6.424e-09	1.18e-05	2.099e-06	1.699e-05	19	400	EPHB6,PGBD4P1,MAPK8IP1P1,TRPV6,SCG5,PRSS58,KANSL1,PRSS1,LINC02210-CRHR1,HNF1B,MIR4435-2HG,OCA2,TRBV30,TRBV29-1,TRBV27,TRBJ2-7,TRBD1,TRBC2,WBP1LP1
Disease	EFO_0020447	high affinity immunoglobulin gamma fc receptor i measurement	GWAS	6.857e-09	1.26e-05	2.099e-06	1.699e-05	4	4	IGLV3-25,IGLVVI-22-1,IGLVVI-25-1,IGLV3-22
Disease	EFO_0008209	leukocyte immunoglobulin-like receptor subfamily B member 2 measurement	GWAS	2.73e-08	5.016e-05	7.166e-06	5.799e-05	5	11	LILRB2,RPS9,RNU6-1307P,MIR4752,LILRB5
Disease	EFO_0020789	troponin i, fast skeletal muscle measurement	GWAS	3.404e-08	6.253e-05	7.816e-06	6.326e-05	4	5	IGKV2D-24,IGKV2D-23,IGKV3-31,IGKV1-32
Disease	EFO_0008126	extracellular matrix protein 1 measurement	GWAS	7.493e-08	0.0001376	1.529e-05	0.0001238	5	13	MRPS21,TARS2,RPRD2,PRPF3,PLEKHO1
Disease	EFO_0802705	leukocyte immunoglobulin-like receptor subfamily B member 3 measurement	GWAS	1.014e-07	0.0001862	1.552e-05	0.0001256	4	6	RPS9,LILRA6,TMC4,LILRB3
Disease	EFO_0803079	SLAM family member 8 measurement	GWAS	1.014e-07	0.0001862	1.552e-05	0.0001256	4	6	IGKV3D-25,IGKV2D-24,IGKV3-15,IGKV1-16
Disease	EFO_0801767	leukocyte immunoglobulin-like receptor subfamily A member 6 measurement	GWAS	1.014e-07	0.0001862	1.552e-05	0.0001256	4	6	RPS9,LILRA6,MIR4752,LILRB3
Disease	EFO_0009417	CCL23 measurement	GWAS	2.348e-07	0.0004314	3.082e-05	0.0002494	4	7	CCL15-CCL14,CCL15,CCL18,CCL23
Disease	EFO_0008049	C-C motif chemokine 23 measurement	GWAS	2.348e-07	0.0004314	3.082e-05	0.0002494	4	7	CCL15-CCL14,CCL15,CCL18,CCL23
Disease	EFO_0008151	hepatitis A virus cellular receptor 2 measurement	GWAS	4.663e-07	0.0008566	5.711e-05	0.0004622	4	8	RPS15A,ABCC6,NOMO3,ABCC6P1
Disease	EFO_0020621	pancreatic hormone measurement	GWAS	1.379e-06	0.002533	0.0001583	0.001281	4	10	FAM25G,AGAP12P,FRMPD2B,PTPN20CP
Disease	EFO_0008043	C-C motif chemokine 15 measurement	GWAS	2.151e-06	0.003952	0.0002325	0.001881	4	11	CCL15-CCL14,CCL15,CCL18,CCL23
Disease	EFO_0010230	phosphatidylinositol measurement	GWAS	2.708e-06	0.004975	0.0002764	0.002237	8	95	RPS9,TFPT,TSEN34,MBOAT7,LENG1,TMC4,PRPF31,CNOT3
Disease	EFO_0008044	C-C motif chemokine 16 measurement	GWAS	3.204e-06	0.005885	0.0002942	0.002381	4	12	CCL15-CCL14,CCL15,CCL18,CCL23
Disease	EFO_0008085	Ck-beta-8-1 measurement	GWAS	3.204e-06	0.005885	0.0002942	0.002381	4	12	CCL15-CCL14,CCL15,CCL18,CCL23
Disease	EFO_0020066	diacylglycerol 38:4 measurement	GWAS	6.385e-06	0.01173	0.0005586	0.004521	4	14	MBOAT7,TMC4,PRPF31,CNOT3
Disease	EFO_0004886, EFO_0006930	brain volume measurement, intracranial volume measurement	GWAS	7.475e-06	0.01373	0.0006242	0.005052	3	5	MAPT-AS1,CRHR1,LINC02210-CRHR1
Disease	OBA_2045199	level of Sterol ester (27:1/20:3) in blood serum	GWAS	2.385e-05	0.04381	0.001825	0.01477	4	19	PDXDC1,MYH11,BMERB1,NTAN1
Disease	EFO_0020065	diacylglycerol 38:3 measurement	GWAS	2.385e-05	0.04381	0.001825	0.01477	4	19	MBOAT7,TMC4,PRPF31,CNOT3
Disease	EFO_0004918, MONDO_0005178	age at diagnosis, osteoarthritis	GWAS	2.581e-05	0.04741	0.001896	0.01535	3	7	MAPT,MAPK8IP1P1,KANSL1
